# **Reciprocal regulation between cell mechanics and ZO-1 guides tight junction assembly and epithelial morphogenesis**

Alexis J. Haas<sup>1</sup>, Ceniz Zihni<sup>1</sup>, Susanne M. Krug<sup>2</sup>, Riccardo Maraspini<sup>4</sup>, Tetsuhisa Otani<sup>3</sup>, Mikio Furuse<sup>3</sup>, Alf Honigmann<sup>4,5</sup>, Maria Balda<sup>1\*</sup> and Karl Matter<sup>1\*</sup>

<sup>1</sup>UCL Institute of Ophthalmology, University College London, London EC1V 9EL, UK

<sup>2</sup>Clinical Physiology / Nutritional Medicine, Charité - Universitätsmedizin Berlin, Campus Benjamin Franklin, 12203 Berlin, Germany

<sup>3</sup>Division of Cell Structure, National Institute for Physiological Sciences, Okazaki, Aichi 444-8787, Japan

<sup>4</sup>Max Planck Institute of Molecular Cell Biology and Genetics, 01309 Dresden, Germany

<sup>5</sup>Biotechnologisches Zentrum (BIOTEC), Center for Molecular and Cellular Bioengineering (CMCB), Technische Universität Dresden, 01307 Dresden, Germany

\*Address for Communications

UCL Institute of Ophthalmology

University College London

Bath Street

London EC1V 9EL, UK

T: 44/20 76084014/6861

[k.matter@ucl.ac.uk](mailto:k.matter@ucl.ac.uk)/[m.balda@ucl.ac.uk](mailto:m.balda@ucl.ac.uk)

## ABSTRACT

Formation and maintenance of tissue barriers require the coordination of cell mechanics and cell-cell junction assembly. Here, we combined methods to modulate ECM stiffness and to measure mechanical forces on adhesion complexes to investigate how tight junctions regulate cell mechanics and epithelial morphogenesis. We found that depletion of the tight junction adaptor ZO-1 regulates cytoskeletal tension at cell-matrix and cell-cell interfaces in an ECM stiffness-regulated manner, possibly via differential organisation of the actin cytoskeleton. ZO-1 depletion inhibited junction assembly and disrupted morphogenesis in an ECM stiffness-dependent manner. Both processes were rescued by inhibition of cell contractility. Although ZO-1-deficient cells could assemble functional barriers at low tension, their tight junctions remained corrupted with strongly reduced and discontinuous recruitment of junctional components. Our results thus reveal that reciprocal regulation between ZO-1 and cell mechanics controls tight junction assembly and epithelial morphogenesis, and that tension-independent roles of ZO-1 control proper junction organisation.

## INTRODUCTION

Preservation of epithelial and endothelial barrier function during tissue morphogenesis and homeostasis requires coordination of cell-cell interaction, ECM adhesion, and cellular mechanical properties. Such adaptive processes rely on cells sensing their physical environment through mechanotransduction pathways activated at adhesion sites that guide cell-wide changes through still not well understood mechanisms (Charras and Yap, 2018; Elosegui-Artola et al., 2016).

Adhesion complexes are composed of transmembrane adhesion proteins interacting with cytosolic components that serve as linkers to the cytoskeleton and have different types of regulatory functions. The actomyosin cytoskeleton plays an important role in cells' responses to mechanical stress and in the regulation of adhesion complexes at the cell-cell as well as cell-ECM interface (Charras and Yap, 2018). Similarly, interplay between different adhesion sites is thought to guide cell and tissue morphogenesis (Borghi et al., 2010; Mui et al., 2016). Vertebrate epithelial and endothelial cells adhere to each other via intercellular junctions with two of them, tight (TJ) and adherens (AJ) junctions, forming the apical junctional complex (Quiros and Nusrat, 2014; Zihni et al., 2016). TJ form paracellular semipermeable barriers that discriminate solutes on the basis of size and charge, and are essential for tissues to form functional barriers (Zihni et al., 2016). Maintenance of the junctional barrier requires TJ to adapt to mechanical stress and cells to respond to forces acting on TJ (Haas et al., 2020). However, such processes are still poorly understood.

A central role in the regulation of mechanosensation and force transmission at TJ is played by ZO-1, a multidomain cytosolic protein of the MAGUK family that links the junctional membrane to the cytoskeleton (Fanning et al., 1998; Haas et al., 2020; Schwayer et al., 2019; Tornavaca et al., 2015). ZO-1 and the related MAGUK ZO-2 are thought to exist in an open and a closed conformation that differ in their ligand binding properties, a switch thought to be regulated by actomyosin activity (Gonzalez-Mariscal et al., 2017; Spadaro et al., 2017). Mechanical load on ZO-1 is regulated by the junctional adhesion molecule JAM-A (Haas et al., 2020). JAM-A depletion stimulates junctional actomyosin activation by p114RhoGEF, which is important for junctional integrity. Hence, ZO-1 may be important for junctional integrity when cell-cell contacts carry a high mechanical load. A mechanical load-dependent role of ZO-1 in junctional integrity might also explain the differential impact of ZO-1 depletion on junctional integrity and morphogenetic responses in different experimental models (Katsuno

et al., 2008; McNeil et al., 2006; Phua et al., 2014; Schwayer et al., 2019; Sourisseau et al., 2006; Tokuda et al., 2014; Tornavaca et al., 2015; Umeda et al., 2006; Van Itallie et al., 2009). ZO-1 knockout mice develop disorganised notochords and neural tubes around an embryonic stage at which these tissues represent the stiffest areas of the developing embryo (Katsuno et al., 2008; Raghunathan et al., 2017). However, such a stiffness-dependent role of ZO-1 in TJ formation and tissue morphogenesis has not yet been demonstrated.

Here, we combined approaches to tune ECM stiffness with methods to measure forces on adhesion complexes to investigate the role of ZO-1 in regulating cell mechanics and epithelial morphogenesis. We found that ZO-1 regulates forces acting on AJ and ECM adhesion but that the impact on AJ was dependent on ECM stiffness, possibly due to differential organisation of the actin cytoskeleton. The requirements for ZO-1 for junction formation and 2D morphogenesis were also tension-dependent. ECM stiffness-induced effects on junction assembly were dependent on the focal adhesion mechanotransducer talin and the TJ-regulated RhoA exchange factor GEF-H1. Similarly, defective morphogenesis could be rescued by inhibiting cytoskeletal contractility. Structural and functional studies further revealed that ZO-1-knockout cells under low tension assemble functional permeability barriers but with TJ that are structurally deficient. Our results thus indicate reciprocal regulation between cell mechanics and ZO-1, and identify tension-dependent and -independent roles of ZO-1 in TJ formation.

## RESULTS

### **Regulation of mechanical tension at AJ by ZO-1 is dependent on matrix stiffness**

Depletion of ZO-1 impacts on monolayer and AJ tension in different experimental model systems. However, the reported effects are contradictory. While in primary human endothelial cells and zebrafish embryos ZO-1 depletion/knockout led to reduced cell-cell tension (Schwayer et al., 2019; Tornavaca et al., 2015), depletion of ZO proteins in MDCK cells was reported to stimulate increased mechanical tension (Cartagena-Rivera et al., 2017). F-actin staining of endothelial and MDCK cells revealed that the two cell types possess a fundamentally different F-actin organisation on stiff substrates with MDCK cells displaying strong junctional, basal, and apical staining, whereas endothelial cell F-actin was mostly lateral (Fig.1A and Fig.S1). Similarly, the investigated cells in zebrafish embryos display high lateral F-actin concentrations (Schwayer et al., 2019). Hence, differential F-actin organisation may lead to distinct outcomes of ZO-1 depletion on cell-cell tension.

ECM stiffness determines cytoskeletal organisation and tension (Mui et al., 2016). Hence, we first asked whether manipulating ECM stiffness would enable switching MDCK cells between different modes of actin organisation. Unlike cells grown on glass, cells grown on soft ECM of 40 and 1 kPa hydrogels displayed strong apical and lateral F-actin and little basal F-actin (Fig.1A,B). Staining for double phosphorylated myosin regulatory light chain as a measure for active myosin-II, revealed strong lateral staining. Substrate stiffness thus regulates actomyosin organisation in MDCK cells, with decreased stiffness leading to adoption of an F-actin organisation reminiscent of endothelial cells.

We next transfected MDCK cells grown on different substrates with an E-cadherin FRET tension sensor to analyse the effect of RNAi-mediated ZO-1 depletion on tension acting on AJ (Borghi et al., 2012). ZO-1 knockdown led to increased tension at AJ when cells were grown on glass or Matrigel-coated glass as indicated by the decrease in lateral FRET efficiency (Fig.1C-E). In contrast, in cells on Matrigel-coated elastic ECM, ZO-1 depletion led to reduced AJ tension. Thus, substrate stiffness determines the impact of ZO-1 depletion on tension acting on AJ. Hence, tension on AJ is positively regulated by ZO-1 in cells that have a

preferential junctional actin organisation as opposed to cells with a strong basal cytoskeleton, suggesting that ZO-1 depletion leads to reduced tension along the apical/junctional actin belt but increased basal contractility. The correlation between F-actin organisation and impact of ZO-1 depletion on cell-cell tension supports a model in which the cytoskeletal architecture of different cell types determines the effect of ZO-1 depletion on cell-cell tension.

### **Matrix stiffness modulates ZO-1 regulation of cell morphodynamics**

Considering the impact of ZO-1 depletion on AJ tension on ECM with different properties, we asked if and how ZO-1 depletion regulates morphogenetic processes on different substrates. ZO-1 was efficiently depleted with two distinct siRNAs (Fig.2A-C). Depletion by the pooled siRNAs was kept as the main condition to limit off-target effects. To control specificity, a GFP-tagged mouse ZO-1 expressing cell line was used (GFP-mZO-1). Although GFP-mZO-1 expression was lower in these cells than endogenous ZO-1, the level was not affected by transfection of siRNAs against canine ZO-1 (Fig.2A-B).

To analyse cell and monolayer morphogenesis, experimental parameters were adjusted to analyse cells during the initial steps of 2D epithelial morphogenesis during which dynamics is high (i.e., migrative edge of islands, continent formation), but with cell islands large enough to discriminate densely packed centres from sparser edges (Treat et al., 2009). Hence, siRNA-transfected MDCK cells were plated for 48 hours only after seeding at cell densities too low to form confluent monolayers.

Figure 2D-F shows that ZO-1 knockdown led to a dramatic morphological change when seeded on glass. The cells were flatter, more elongated (~3-fold increase in xy area) and had an apparently weaker lateral F-actin belt but increased basal stress fibres. The phenotype was rescued by GFP-mZO-1 expression (Fig.2D, Fig.S2). ZO-1 depletion also induced increased spreading on 40 kPa hydrogels (~1.5-fold increase), but without the strong induction of basal stress fibres observed on glass. ZO-1-depleted cells grown on the soft 1 kPa hydrogels appeared smaller and rounder than control cells. Hence, the impact of ZO-1 depletion on epithelial morphodynamics was determined by ECM stiffness.

### **ZO-1 regulates junction formation and myosin-II activity and distribution**

Staining of the TJ protein occludin revealed that ZO-1 depletion led to disrupted junctions in cells grown on glass, with a twice as strong effect in sparse areas (Fig.3A). On 40 kPa hydrogels, the junctional disruption was less pronounced in dense areas, but remained high in sparse ones. Conversely, we observed no TJ disruption in cells grown on 1 kPa or in the GFP-mZO-1 cell line grown on glass (Fig.3A, Fig.S3A). Hence, substrate stiffness determines the importance of ZO-1 for TJ formation.

ZO-1 regulates myosin activation in different cell types and conditions (Tornavaca et al., 2015; Van Itallie et al., 2009). Treating cells with the myosin-II inhibitor blebbistatin rescued TJ formation in ZO-1 depleted cells grown on glass or 40 kPa; hence, actomyosin activity is required to inhibit TJ formation (Fig.3A,B; Fig.S3B). Stimulation of actomyosin activity by ZO-1 depletion was validated by immunoblotting, revealing a ~ twofold increase in double-phosphorylated myosin light chain (ppMLC), regardless of matrix stiffness (Fig.3C-E). In contrast, the distribution of ppMLC was strongly affected by the ECM with increased peripheral ppMLC bundles in ZO-1 depleted cells grown on glass (especially in sparse cells), which was more modest in cells grown on 40 kPa (Fig.3F). No differences were observed in cells grown on 1 kPa. A striking feature of ppMLC distribution on glass, which was not detected on hydrogels, was the appearance of lateral sharp filaments at cell-cell junctions, correlating with the increased tension observed at AJ (Fig.3F, Fig.S3C). Blebbistatin treatment counteracted



formation of those peripheral structures, indicating that their formation requires myosin activity (Fig.3H; Fig.S3B). Staining for the AJ marker p120-catenin did not reveal any clear signs of AJ disruption upon ZO-1 depletion on any substrate although the signal was weaker, possibly reflecting cell flattening (Fig.3I).

Depletion of ZO-1 thus disrupted TJ, but not AJ, formation in an ECM stiffness-dependant manner and led to a stiffness-dependant reorganisation of active myosin. The morphological phenotypes could be rescued by blebbistatin treatment, indicating a mechanistic link between ZO-1 control of junction formation, and actomyosin activity and organisation.

### **ZO-1 controls 2D morphogenesis on soft ECM**

Reduction of ZO-1 expression in MDCK cells using shRNAs disrupts morphogenesis in 3D Matrigel ECM (Odenwald et al., 2016; Sourisseau et al., 2006). We observed a comparable phenotype upon depletion of ZO-1 with siRNAs (Fig.S4A). The 3D morphogenesis defect was attributed to the absence of a spatial cue as those cell lines formed morphologically normal monolayers in 2D. However, 3D Matrigel gels are very soft (<1 kPa) (Soofi et al., 2009); hence, it is also possible that low ECM stiffness combined with enhanced actomyosin activity causes the morphogenesis defect. Therefore, we tested whether ZO-1 depletion impacts on 2D morphogenesis on soft ECM.

While ZO-1 depleted cells had intact cell-cell junctions on 1 kPa ECM (Fig.3), they formed only small islands that failed to form large islands of continuous monolayers (Fig.4A,B). Monolayers formed normally on 40 kPa hydrogels or glass. Monolayer formation was rescued by treating cells with blebbistatin and by mouse ZO-1 expression (Fig.4A,B). Control GFP-mZO-1 cells displayed continuous but smaller islands compared to wild-type cells, possibly reflecting reduced proliferation upon ZO-1 transfection (Balda et al., 2003).

To validate this phenotype, we analysed CRISPR/Cas9-generated knockout MDCK clones (Beutel et al., 2019). Two distinct ZO-1 knockout clones were used along with a clone lacking expression of both ZO-1 and ZO-2 (Fig.4C). All knockout clones displayed defective 2D morphogenesis on 1 kPa hydrogels (Fig.4D-G). No significant differences were observed between single and double knockout clones. ZO-1 is thus required for epithelial morphogenesis on soft ECM.

### **ZO-1 regulates cell traction on the ECM**

We next asked if ZO-1 regulates focal adhesion function. Immunostaining of vinculin in ZO-1 depleted cells seeded on glass revealed that focal adhesions were strongly remodelled upon ZO-1 depletion, appearing thicker and more elongated (Fig.5A-C). Such changes are signs of increased mechanical load on basal adhesions (Riveline et al., 2001). Therefore, we next used traction force microscopy to measure how ZO-1 depletion impacted on the forces exerted by cells on the substrate.

Figure 5D-F shows that depletion of ZO-1 in cells seeded on stiff polyacrylamide hydrogels resulted in increased strain energy densities of more than 50%. Hence, ZO-1 controls the traction forces cells exert on the substrate, raising the possibility that myosin-dependent junction disruption on stiff ECM are due to pulling forces generated when cells are grown on substrates that offer sufficient mechanical resistance. Therefore, we tested whether interfering with mechanotransduction at focal adhesions can rescue TJ formation by depleting talin (Elosegui-Artola et al., 2016) either on its own or together with ZO-1. Immunoblotting showed that double knockdown resulted in comparable depletion levels to the ones obtained with individual siRNA transfections (Fig.5G). We performed analogous experiments depleting GEF-H1 as this RhoA activator is inhibited by intact TJ and regulates the response to

mechanical forces on integrins (Fig.5H) (Aijaz et al., 2005; Guilluy et al., 2011). Immunofluorescence of occludin revealed that depletion of both talin and GEF-H1 in ZO-1 knockdown cells rescued TJ formation (Fig.5I,K). Talin depletion also led to a compaction of cell islands reminiscent of cells grown on 1 kPa ECM, supporting the conclusion that ECM stiffness and mechanotransduction at focal adhesions is central to the ZO-1 depletion phenotype.

Thus, ZO-1 acts as a regulator of cell-ECM traction and both reduction of ECM stiffness or inhibition of basal mechanotransduction counteract the effect of ZO-1 depletion on junction formation, indicating that the main ZO-1-specific role during junction formation is control of cytoskeletal tension and the resulting forces acting on cell-cell and cell-matrix adhesion complexes.

### **The ZO-1 knockout enhances the depletion phenotype**

We next analysed the functional role of ZO proteins in junction formation in knockout clones as RNAi-mediated depletion may be affected by variable silencing efficiencies. When cells were seeded as described for the knockdown experiments, ZO-1 knockout clones displayed defective TJ formation, comparable to ZO-1 knockdown cells (Fig.6A,B). The ZO-1/2 double knockout lacked junctional occludin staining as expected (Beutel et al., 2019; Otani et al., 2019). Although AJ appeared intact, p120-catenin staining intensity at junctions was reduced with increased cytosolic staining, a feature we had not observed in the ZO-1KD model (Fig.6A,C); hence, the more efficient removal of the protein in the knockout led to an enhanced phenotype.

Seeding the knockout cells on elastic ECM again led to a rescue of TJ formation and the 1 kPa ECM did so more efficiently than the stiffer one (Fig.6D). However, no rescue of TJ formation occurred with the double knockout cells. ZO-1 knockout stimulated MLC phosphorylation and a striking redistribution of F-actin and active myosin, with increased stress fibres and bundles of lateral phosphorylated MLC in cells plated on glass (Fig.6E, Fig.S4B). However, in the double knockout cells, actomyosin bundles remained more basally distributed.

ZO-1 knockout and siRNA-mediated depletion thus led to fundamentally similar phenotypes with a TJ formation defect that was dependent on ECM stiffness. However, the knockout phenotype was stronger, possibly reflecting residual ZO-1 expression in the knockdown cells.

### **ZO-1 and ZO-2 have different functions in TJ formation**

The occludin staining in the ZO-1 knockout clones appeared discontinuous in the 2-day cultures in cells plated on 1 kPa ECM (Fig.6D); hence, we tested whether formation of a continuous occludin distribution required more time in ZO-1 knockout cells. However, even after longer time of culture, occludin appeared in patches aligned with cell-cell contacts (Fig.7A). The cytosolic junctional proteins ZO-2, cingulin, ZO-3 and GEF-H1 displayed strongly increased cytosolic pools and, if junctional staining was detected, it was patchy (Fig.7B, Fig.S5A,B). The discontinuous junctional occludin staining was not affected by blebbistatin, indicating that it was not due to increased actomyosin activity (Fig.S5C). Staining for p120-catenin was comparable with wild-type cells in all clones, indicating that the phenotype observed at lower density reflected delayed AJ formation.

To determine if ZO-2 expression is required for normal TJ formation, we expressed GFP-tagged ZO-1 or ZO-2 in double knockout cells. Expression of GFP-ZO-1 efficiently recovered TJ formation (Fig.7C). In contrast, much of the expressed GFP-ZO-2 remained cytosolic and the pool that was at junctions formed patches. Occludin followed the junctional ZO-2 pattern

and cingulin remained primarily cytosolic. Hence, GFP-ZO-2 was unable to induce normal TJ assembly.

We next tested the role of endogenous ZO-2 by employing recently described individual ZO-2 knockout cells along with a TALEN-generated ZO-1 knockout and a corresponding double knockout cell line (Otani et al., 2019; Tokuda et al., 2014). The TALEN ZO-1 knockout had not revealed such a strong effect on other junctional proteins or junctional patches of occludin as we observed here in ZO-1 knockout clones (Tokuda et al., 2014). Immunoblotting revealed that ZO-2 depletion was efficient; however, ZO-1 was still expressed at low levels in the TALEN-generated ZO-1 knockout (Fig.7D). The remaining expression may be due to an in-frame ATG shortly after the TALEN-mutated translational start codon (the ZO-1 allele in the double knockout was generated using a CRISPR-Cas9 approach; Otani et al., 2019). Both, the partial ZO-1 knockout as well as the ZO-2 knockout still supported a continuous occludin distribution (Fig.7E). As the knockouts had been generated in a different strain of MDCK cells, we also re-expressed ZO-1 and ZO-2 in double knockout cells and observed that ZO-1, but not ZO-2, was efficiently recruited to cell junctions and that only ZO-1 induced a continuous linear junctional distribution of occludin (Fig.7F). Thus, ZO-1 and ZO-2 have distinct functions and differ in their potential to induce TJ formation as ZO-1 was required for normal TJ formation, but ZO-2 was dispensable.

### **ZO-1 knockout increases transepithelial permeability and disrupts TJ ultrastructure**

The defects in TJ assembly observed in ZO-1 knockout cells prompted the question how junctional permeability was affected. To test this, we plated the cells on filter inserts. We first tested whether mature monolayers on filters still exhibited the junctional patches of membrane proteins. Figure 8A-D and Figure S6 show that junctional recruitment of occludin and different claudins was reduced and their junctional distribution irregular in ZO-1 knockout cells with the most striking discontinuities displayed by occludin. The recruitment of the cytosolic protein cingulin was disrupted (Fig.S6D). The least affected protein was JAM-A; however, like other junctional membrane proteins, its TJ recruitment was strongly reduced in ZO-1 knockout cells (Fig.8D; Fig.S6C). Confocal z-sectioning also indicated irregularities in the arrangement of the nuclei as they often appeared arranged in an irregular manner in cells lacking ZO-1 rather than localising close to the basal end of the cells, suggesting that ZO-1 regulates nuclear positioning (Fig.8D).

We next analysed the barrier function by measuring transepithelial electrical resistance (TER) and paracellular tracer flux of 4 and 70kD fluorescent dextran. TER was ~ 10% lower in the two ZO-1 knockout clones (Fig.8E). No significant increase in permeability for the 70kD tracer was observed, indicating no general defects in monolayer integrity (Fig.8F). However, 4kD dextran diffusion was increased by ~ 4-fold, indicating increased size-selective diffusion. Thus, ZO-1 knockouts were still able to form functional barriers despite the discontinuous distribution of junctional membrane proteins; however, both ion conductance and small tracer permeability increased.

TJ contain a network of intramembrane strands that can be detected by freeze fracture-electron microscopy (Cereijido et al., 1981; Zihni et al., 2016). These strands are thought to be formed by claudin and occludin family proteins. Freeze fracture electron microscopy revealed that in wild type cells strands predominantly appeared as particle-type as expected (Furuse et al., 2001). This was largely also the case for the ZO-1 knockout clones; however, their number was halved (Fig.9). The meshwork extension was also reduced (Fig.9B). In the ZO-1/2 KO cells, not only was the presence of TJ strands uncommon, those that were detected showed a strongly reduced number of strands and meshwork extension (Fig. 9A,B)

and a tendency towards a more continuous appearance. In the ZO-1 KO clones, strands did not seem disrupted as in the double knockout clone but, due to the reduced number, we often just detected single strands; in the ZO-1/2 KO even the strand-like areas appeared unorganized (Fig.9C). In addition, there was a tendency of increased breaks and structural defects in tricellular corners. Although clear tricellular corners were only rarely found and could hence not be evaluated quantitatively, they appeared to consist only of the central tube and lacked the typical branches (Fig.9D). Tricellulin, a transmembrane protein required for strand branching in tricellular junctions (Sugawara et al., 2021), was strongly reduced at tricellular junctions (Fig.9E,F). Thus, while the discontinuous junctional distribution of membrane proteins was paralleled by striking changes in TJ ultrastructure, the ZO-1 knockout cells were still able to form intramembrane strands that appeared largely morphologically normal.

## DISCUSSION

Our results indicate that ZO-1's function in TJ assembly and cell morphogenesis depends on the mechanical properties of the cell, and, in turn, that ZO-1 impacts on the forces acting on adhesion complexes mediating interactions with neighbouring cells and the ECM. While functional TJ can form without ZO-1 in monolayers plated on very soft ECM, TJ remain structurally deficient, indicating that the role of ZO-1 in junction assembly extends beyond transmission and regulation of cell-cell tension. Hence, ZO-1 has tension-dependent and -independent functions that regulate TJ assembly and epithelial morphogenesis (Fig.10).

ZO-1 carries a mechanical load and is thought to play a central function in mechanosensing at TJ (Haas et al., 2020; Schwayer et al., 2019). ZO-1 regulates tension on AJ and overall cell-cell tension; however, the results reported are contradictory. While in primary endothelial cells *in vitro* and zebrafish embryo *in vivo* cell-cell tension decreased upon ZO-1 depletion, MDCK monolayers depleted of both ZO-1 and its close homologue ZO-2 exhibited increased cell-cell tension (Cartagena-Rivera et al., 2017; Schwayer et al., 2019; Tornavaca et al., 2015). Our data now provide a possible explanation for the different observations reported. The effect of ZO-1 depletion on AJ tension in MDCK cells depended on ECM stiffness, which also determined actin cytoskeleton architecture. ZO-1 depletion on stiff ECM led to a stronger induction of stress fibres and actomyosin fibres at the apical periphery, likely to promote monolayer tension. Hence, the physical properties of the ECM determine how ZO-1 impacts on cell-cell tension.

Primary endothelial cells, which display reduced AJ tension upon ZO-1 depletion (Tornavaca et al., 2015), exhibit a similar actomyosin organisation to MDCK cells on soft ECM, forming a strong junctional actomyosin cytoskeleton. Similarly in zebrafish, the cell-cell contacts shown to have reduced tension in response to ZO-1 knockout are actomyosin-enriched (Schwayer et al., 2019). Therefore, these observations support a model in which the relative enrichment of the lateral cytoskeleton compared to the basal membrane determines the role of ZO-1 in cell-cell tension regulation. As actomyosin accumulation itself is regulated by forces acting on the cell, these observations suggest that in cell sheets in which tension is primarily determined by junctional forces ZO-1 positively impacts on AJ tension, and in monolayers in which tension is determined by high ECM stiffness ZO-1 negatively regulates tension by inhibiting basal actomyosin activity.

ZO-1 not only regulates cell-cell tension but also traction forces acting on the ECM and, thereby cell and monolayer morphology. The assay we employed requires the use of a soft ECM (~16.4 kPa); hence, increased traction forces are not limited to very stiff matrices. On very soft matrices (1 kPa), cells with reduced ZO-1 expression failed to form large islands of

monolayers but contracted, which was actomyosin-dependent. Thus, ZO-1 depletion modulates both mechanical forces acting on AJ as well as on the ECM. Cell spreading upon ZO-1 depletion was strongly inhibited by depleting talin, indicating that mechanotransduction at focal adhesions is required for increased traction forces.

Our data thus indicate that ZO-1 depletion leads to cell-wide changes in cell mechanics that are modulated by the overall actin organisation of the cell. This is supported by the recent observation that ZO proteins regulate tissue fluidity in migrating cells (Skamrahl et al., 2021). It is thus likely that the biological importance of ZO-1 and its impact on morphogenetic processes are dependent on other factors that regulate organisation of the actin cytoskeleton, such as the cell type or ECM properties. It will be interesting to study such roles of ZO-1 in other dynamic biological processes. For example, ZO-1 knockout in mice leads to defective notochord and neural tube organisation at E9.5 (Katsuno et al., 2008). These tissues represent the stiffest area of the developing embryo around this developmental stage (Raghunathan et al., 2017). Hence, mouse embryonic development may rely on regulation of cell and tissue mechanics by ZO-1.

We found that ZO-1 has specific tension-dependent and -independent functions that regulate TJ assembly. In cells on stiff ECM, ZO-1 was required for efficient TJ formation, which was actomyosin-dependent. ZO-1 depletion is well established to stimulate myosin-II activation (Tornavaca et al., 2015; Van Itallie et al., 2009) and did so also on 1 kPa ECM, on which TJ formation was not ZO-1 dependent. However, on 1 kPa hydrogels junctions are under low tension (Fig.1; (Haas et al., 2020); hence, ZO-1 was only required for TJ formation if junctions had to support high tension. A tension-dependent role for ZO-1 in TJ formation is compatible with previous studies on the role of ZO-1 in calcium-switch experiments on glass (McNeil et al., 2006) or in primary endothelial cells (Tornavaca et al., 2015). The requirement of ZO-1 for TJ formation in cells under high tension is further supported by the observations that depletion of the focal adhesion mechanotransducer talin and the RhoA exchange factor GEF-H1, which stimulates cell spreading and stress fibre formation, rescued TJ formation. GEF-H1 is inhibited by TJ recruitment (Aijaz et al., 2005) and remained cytosolic in ZO-1 deficient MDCK cells. Hence, one of the functions of ZO-1 during TJ formation is the coordination of junction formation with GEF-H1 recruitment and inactivation.

ZO-1 interacts with both transmembrane proteins and the cytoskeleton (Fanning et al., 1998) and carries a mechanical load that is dependent on actomyosin activity (Haas et al., 2020). The tension acting on ZO-1, like TJ formation in its absence, is dependent on ECM stiffness, suggesting a model in which ZO-1 supports junction formation by adapting the cytoskeletal forces generated in the cell body to the forming TJ. However, such a cytoskeletal linker function may already be important prior to integration of ZO-1 into the forming junction. TJ formation involves a phase separation of cytosolic junctional proteins that is driven by ZO proteins (Beutel et al., 2019; Schwayer et al., 2019). Phase separation occurs prior to arrival of ZO-1 at TJs, and movement of the condensates to the membrane is powered by actomyosin activity (Kinoshita et al., 2022; Schwayer et al., 2019). However, alternative roles of ZO-1 are likely to contribute to the tension-dependent effects, such as its role in the regulation of cell signalling and, in particular, the junctional recruitment and spatial regulation of RhoA exchange factors such as GEF-H1 and p114RhoGEF (Zihni et al., 2016).

ZO-1 also serves a tension-independent role at TJ. In monolayers under low tension, TJ assembled but junctional proteins were very inefficiently recruited and distributed irregularly along the junction. While reduced TJ protein recruitment had previously been observed in ZO-



1 knockout cells, the effect was modest and no discontinuities of junctional membrane proteins were observed, which was likely due to incomplete depletion (Tokuda et al., 2014). Given the low remaining levels of ZO-1 expression in those knockout cells, only small amounts of ZO-1 are required to mediate the continuous linear junctional arrangement of other TJ proteins. This is also a likely reason why the effects of ZO-1 depletion were missed in previous studies using MDCK cells carrying shRNA plasmids (Van Itallie et al., 2009). ZO-1 was also knocked out in other cell types, and no effects on TJ were reported (Phua et al., 2014; Umeda et al., 2006; Umeda et al., 2004). However, those knockout alleles involved removing early exons (part of PDZ1); hence, residual expression of truncated forms or genetic compensation mechanisms may have prevented detection of the phenotype (Ma and Chen, 2020).

The biochemical and functional properties causing the differences between ZO-1 and ZO-2 is not clear. However, ZO-1 is more efficiently recruited and more stably associated with TJ (Beutel et al., 2019). It is possible that regulatory mechanisms that regulate phase separation during TJ formation may be the underlying reason as the three ZO proteins differ in their propensity for phase separation (Beutel et al., 2019) or that ZO-1 recruits signalling proteins that control junction assembly and stability (Matter and Balda, 2003b).

ZO-1 knockout also disrupted the normal ultrastructure of TJ. TJ strand formation is reduced at bi- and tricellular corners in cells lacking TJ transmembrane proteins (Otani et al., 2019; Saito et al., 2021; Sugawara et al., 2021). Hence, attenuation of strand formation as indicated by reductions in the number of horizontal strands and meshwork depth was in line with the reduced recruitment of TJ components. As identification of TJ in fracture replicas is biased towards areas that contain strands, it cannot be excluded that strand numbers are even lower than measured. Nevertheless, the local presence of morphologically detectable intramembrane strands is compatible with the patchy distributions of junctional membrane proteins detected by confocal microscopy since the latter covered a large junctional area, and inducing a discontinuous distribution of an individual junctional protein like occludin does not affect the appearance of intramembrane strands (Balda et al., 1996). The presence of TJ strands in the ZO-1 knockout cells is certainly in agreement with the remaining TER in those cells. The reduced number of strands could also explain the increase in selective paracellular permeability as diffusion would be expected to occur more quickly across a TJ with fewer strands (Steed et al., 2010). Alternatively, the data would also be compatible with a model in which strands are formed by unconventional lipid structures that are stabilised by junctional transmembrane proteins (Calderon et al., 1998; Shigetomi et al., 2018; Steed et al., 2010).

Our data thus provide new insights into the functions of ZO-1 in TJ assembly and epithelial morphogenesis, identifying tension-dependent and -independent roles. Our study indicates that reciprocal regulation between the mechanical properties of the cells and the forming TJ guides junction assembly and epithelial morphogenesis. ZO-1 is at the centre of this crosstalk by regulating signalling components such as GEF-H1, and it will be important to determine how such functional properties of ZO-1 regulate dynamic biological processes and impact on other junctional functions such as the regulation of gene expression.

## **METHODS**

### **Experimental models**

MDCK II cells were used for all experiments except the endothelial experiment shown in Figure S1. Three different sources of MDCK II cells were used that were kept separated to avoid



differences originating from different substrains influencing the results. The RNA interference experiments targeting ZO-1 used the MDCK II strain we have described previously (Matter et al., 1993). The GFP-mZO-1 MDCK cell line was generated using a mouse ZO-1 cDNA cloned into pEGFP-C1. Most experiments with MDCK II knockout cells were performed with cell lines described previously using two ZO-1 knockout clones (MDCK ZO-1KO C1 and C2), a ZO-1/ZO-2 double knockout clone (MDCK ZO-1/2KO), and the corresponding wild type MDCK II cell line (MDCK wt) (Beutel et al., 2019). None of the individual ZO-2 knockout clones tested showed sufficient depletion to be analysed further. A second set of knockout clones was used that had been generated in the Furuse laboratory and was hence marked with 'Fur' to distinguish the different MDCK knockout cell lines. These knockout clones were also previously described and used a Talen approach targeting the start ATG to generate the ZO-1 knockout clone but a CRISPR approach to knockout ZO-1 in the ZO-1/2 knockout; hence, the label for these samples were MDCK<sup>Fur</sup>-wt, ZO-1KO<sup>Fur</sup>, ZO-2KO<sup>Fur</sup>, and ZO-1/2KO<sup>Fur</sup> (Otani et al., 2019; Tokuda et al., 2014). All cell lines were frozen as a contamination-free stock and fresh stock samples were put in culture every 2 months. Primary human dermal microvascular endothelial cells (C-12212) were purchased from PromoCell and cultured in 0.5% gelatin-coated dishes in endothelial cell growth medium MV2 supplemented with C-39225 supplement mix (PromoCell) (Tornavaca et al., 2015). Cells were used between passage two and four. Cells were regularly stained with Hoechst dye to reveal nuclei and DNA of contaminants such as mycoplasma.

### Experimental setups

For experiments with a short culture time to monitor TJ formation during monolayer formation, cells were seeded at  $3 \times 10^5$  cells/well into 6-well plates and transfected with siRNAs the following day. After 24 hours, the cells were trypsinised, resuspended in full medium, and seeded in experimental plates containing the required substrates.  $7 \times 10^3$  cells/well were used for 48-well plates containing glass coverslips uncoated or coated with Matrigel. 24-well plates containing 40 kPa or 1 kPa hydrogels were seeded with  $12.5 \times 10^3$  cells/well or  $25 \times 10^3$  cells/well, respectively. For immunoblotting, cells were plated accordingly using plates of different sizes with or without hydrogels. Experimental plates were processed after 48 hours of culture. This plating concentrations were determined by titration and then chosen so that the cells reached comparable concentrations on all substrates and resulted in cultures consisting of cell islands and larger continents at the end of the experiments. For experiments with knockout clones and short culture times, a corresponding two-step method was used to facilitate comparison (i.e., seeding at  $3 \times 10^5$  cells/well into 6-well plates for 48 hours, before reseeding on different substrates at the same concentrations as for the RNA interference experiments. Experimental plates were also processed after 48 hours of culture. For experiments with mature monolayers on filters,  $3 \times 10^5$  cells were plated into Transwell polycarbonate filters (0.4  $\mu\text{m}$  pore size) and cultured for up to six days. Filter cultures were used for TER measurements using an EVOM and stick electrodes (World Precision Instruments) and transmonolayer flux measurements with 4 kD FITC- and 70 kD Rhodamine-Dextran (Matter and Balda, 2003a). The monolayers reached stable TER values after 3 days of culture.

### Blebbistatin

Cells were treated with 10  $\mu\text{M}$  Blebbistatin diluted from 10 mM stocks in DMSO overnight or for 4 h. Controls were incubated with a corresponding amount of DMSO. Details of the treatments for specific experiments are provided in the figure legends.

## Plasmids

The canine E-cadherin tension sensor constructs (pTS-E-cadherin and pTS-E-cadherin $\Delta$ CTD) were generously provided by Alexander R. Dunn (Stanford University, Stanford, CA, USA) (Borghi et al., 2012) and a plasmid encoding mouse ZO-1 fused to GFP by Junichi Ikenouchi (Kyushu University, Fukuoka, Japan). The latter construct was used to generate pEGFP-mZO1 using the SacI and KpnI sites in pEGFP-C1. pEGFP-ZO-2 was a gift from Marius Sudol (Addgene plasmid # 27422; <http://n2t.net/addgene>: 27422; RRID: Addgene\_27422) (Oka et al., 2010). pGW1-HA-ZO-2 was generously provided by Lorenza Gonzalez-Mariscal (Cinvestav, Mexico DF, Mexico) and Ronald Javier (Baylor College of Medicine, Houston, TX) (Glaunsinger et al., 2001; Huerta et al., 2007).

## Transfections

siRNA transfections were performed using the RNAiMAX transfection reagent following the manufacturer's instructions. Cells in 6-well plates were transfected by adding 8 $\mu$ l/well RNAiMAX and 8 $\mu$ l/well of 20  $\mu$ M siRNA. For double knockdown experiments, siRNAs against two targets were mixed at a 1:1 ratio, and siRNAs against a single target were mixed at a 1:1 ratio with the control siRNA. The following canine siRNAs were used: canine ZO-1: 5'-CCAUGAAUUUCAGAUGU-3' and 5'-CCAGAAUCUCGAAAAGUGCC-3'; canine Talin: 5'-GUCCUCCAGCAGCAGUAUAA-3' and 5'-GAGGCAACCACAGAACACAU-3'; canine GEF-H1 5'-AGACACAGGACGAGGCUUA-3', 5'-GGGAAAAGGAGAAGAUGAA-3', and 5'-GUGCGGAGCGGAUGCGCGUAA-3'. Plasmid DNA was transfected using TransIT (Mirus Bio) by adding 1  $\mu$ l of the reagent and 1  $\mu$ g of DNA per 48-plate well. Transfections were left for 4 hours before media replacement.

## Antibodies and Immunological Methods

Immunological methods for immunofluorescence and immunoblotting were previously described (Balda et al., 1996; Zihni et al., 2014, 2017). Briefly, for immunofluorescence, cells were either fixed in 100% ice-cold MeOH for 5 min at -20 °C before being rehydrated in PBS for 5 min and incubated with blocking buffer (PBS 5% BSA, 10mM glycine, 10% NaN<sub>3</sub>) for 30 min, or fixed in 3% PFA for 20 min at room temperature before permeabilization in PBS 0.3% Triton for 10 minutes and incubation in blocking buffer for 30 minutes. Cells were then incubated with primary antibodies overnight in blocking buffer at 4 °C, washed 3 times with blocking buffer, incubated with secondary antibodies diluted in blocking buffer at room temperature for 2 hours, and washed 3 times with blocking buffer before mounting on glass slides with Prolong Gold (ThermoFisher Scientific). For immunoblotting, cells were lysed in Laemmli sample buffer containing 6M urea and freshly dissolved DTT at a final concentration of 0.3M. The following commercial antibodies were used: occludin, mouse monoclonal (33-1500, ThermoFisher Scientific); ZO-1, mouse monoclonal (33-9100, ThermoFisher Scientific); ZO-2, mouse monoclonal (37-4700, ThermoFisher Scientific); Tricellulin, rabbit polyclonal (48-8400, ThermoFisher Scientific); Claudin-2, mouse monoclonal (32-5600, ThermoFisher Scientific); cingulin, mouse monoclonal (sc-365264, Santa Cruz Biotechnology) and rabbit polyclonal (ab244406, abcam); claudin-1, rabbit polyclonal (51-9000, ThermoFisher Scientific); pMLC-S19, mouse monoclonal (3675, Cell Signaling Inc.) and rabbit polyclonal (3671, Cell Signaling Inc.); ppMLC-Thr18,S19, rabbit polyclonal (3674, Cell Signaling Inc.); p120-catenin, goat polyclonal (sc-373115, Santa Cruz Biotechnology);  $\beta$ -catenin, sheep polyclonal (ab65747, abcam); talin, mouse monoclonal (T3287, Sigma-Aldrich); vinculin, mouse monoclonal (V9131, Sigma-Aldrich); and HA-epitope, rat monoclonal (11867431001,

Roche). Rabbit polyclonal antibodies specific for ZO-2 and ZO-1, and mouse monoclonal and rabbit polyclonal antibodies against GEF-H1 were described previously (Benais-Pont et al., 2003). The rabbit polyclonal antibody against claudin-4 was raised and affinity purified with a PRTDKPYSAKYSAAC peptide. Antibodies against JAM-A (rabbit polyclonal (Tuncay et al., 2015); generously provided by Klaus Ebnet, University of Muenster, Germany)  $\alpha$ -tubulin (mouse monoclonal, (Kreis, 1987), and podocalyxin/gp135 (3F2/D8, deposited to the DSHB by Ojakian, G.K. (Herzlinger et al., 1982) were previously described. The following affinity-purified and cross-adsorbed secondary antibodies from Jackson ImmunoResearch were used: Alexa488-labelled donkey anti-rabbit (711-545-152) and anti-mouse (115-545-003), Cy3-labelled donkey anti rabbit (711-165-152) and anti-mouse (715-165-150) and Cy5-labelled donkey anti-goat (705-175-147) were diluted 1/300 from 50% glycerol stocks. Phalloidin-Atto647 (65906) and Hoechst-33342 were from Sigma-Aldrich. For immunoblotting, affinity-purified HRP-conjugated goat anti-mouse (115-035-003) and anti-rabbit (111-035-144) secondary antibodies for immunoblotting were purchased from Jackson ImmunoResearch and diluted 1/5000 from 50% glycerol stocks, and affinity-purified IRDye 800CW donkey anti-mouse (926-32212) and anti-rabbit (926-32213), and 680LT donkey anti-mouse (926-68072) and anti-rabbit (926-68023) secondary antibodies from LI-COR and diluted 1/10000. Immunoblotting was carried out using either enhanced chemiluminescence or fluorescence for detection as described (Steed et al., 2014; Zihni et al., 2014). Immunoblot images and were quantified with ImageJ/Fiji using the gel densitometry toolset.

#### **Preparation of Matrigel-coated Polyacrylamide (PAA) Hydrogels and Glass Coverslips**

PAA hydrogel fabrication followed the same method as described in (Haas et al., 2020), which was adapted from the protocol used in (Vitiello et al., 2019). Briefly, 22, 13, and 10 mm glass coverslips (Agar Scientific) were washed with 70% ethanol, dried at 70 ° C, and exposed to UV light overnight. 22 and 10mm coverslips were then incubated with a solution of 65 $\mu$ g/ml Matrigel (BD Biosciences) for 2.5 hours at 37 ° C and 13mm coverslips were silanized for 3 minutes using ethanol containing 0.37% Bind-Silane solution (GE Healthcare Life Science) and 3.2% acetic acid. Mixes of PAA and bis-acrylamide (N,N'-methylenebisacrylamide, Sigma-Aldrich) corresponding to elasticity of 1 kPa and 40 kPa were prepared as described (Tse and Engler, 2010).

#### **Preparation of PAA hydrogels with microbeads for Traction Force Microscopy**

PAA hydrogels were prepared for TFM by adding 1  $\mu$ l fluorescent carboxyl polystyrene beads (diameter=0.20  $\mu$ m; Dragon Green) to the PAA mix, before polymerisation. The E-modulus of the TFM gels ranged from 13.6 to 19.6 kPa (average of 16.4 $\pm$ 2.5 kPa). PAA/bis-AA mixes were sonicated and vortexed to avoid bead clumps and to ensure a homogenous distribution of the beads in the gels. We then added N,N,N',N'-tetramethylethylenediamine (TEMED, Sigma-Aldrich) and 10% APS (Sigma-Aldrich) to the mixes at 0.1% and 0.8%, respectively, to prime polymerization. A 25  $\mu$ l drop of activated mix was added on each coated 22 mm coverslips and silanized 13 mm coverslips were then quickly placed on top of the drops. Gels were let to polymerize for 30 minutes. The transfer of matrix proteins from the coated glass coverslip to the surface of the gels occurred by passive microcontact printing on PAA gels ( $\mu$ CP) (Tang et al., 2012). Assemblies were then soaked in sterile H<sub>2</sub>O for 30 minutes. Gels were detached from the 22mm coverslips using a scalpel blade and 13 mm coverslip-bound hydrogels were stored at 4° C in sterile H<sub>2</sub>O containing 150 mM NaCl and 10 mM HEPES. Before seeding cells, gels were incubated with full MDCK culture medium for 30 min at 37°C.

### **Generation of 3D MDCK cysts**

Generation of 3D epithelial cysts with MDCK cells was performed as described in (Sourisseau et al., 2006). Briefly, after trypsinization of siRNA-transfected MDCK cells, trypsin activity was quenched by diluting cells 1:3 in serum-containing medium. Cells were then resuspended to single cell suspensions and counted. Cells ( $20 \times 10^3$  in  $5 \mu\text{l}$ ) were mixed with  $100 \mu\text{l}$  collagen-Matrigel master mix that was prepared as follows on ice:  $60 \mu\text{l}$  of  $1 \text{ mg/ml}$  calf skin type I collagen (Sigma-Aldrich; C8919) was added to a buffering pre-mix containing  $10 \mu\text{l}$   $10\times$  Dulbecco's modified Eagle's medium,  $2 \mu\text{l}$  HEPES  $1 \text{ M}$  (pH 7.4) and  $2$  to  $3 \mu\text{l}$  of  $2 \text{ M}$  NaOH.  $10 \mu\text{l}$   $100\%$  fetal bovine serum and  $16 \mu\text{l}$  of Matrigel (growth factor reduced; BD Biosciences) were then added to obtain the final mix. Cells in the liquid matrices were plated in 48-well plates containing coverslips that had been previously incubated with  $100 \mu\text{l}$  of the collagen-Matrigel master mix for 1 hour at  $37^\circ\text{C}$ . Matrices were allowed to solidify at  $37^\circ\text{C}$  overnight before adding medium consisting of low glucose DMEM (Thermo Fischer) supplemented with  $1\%$  fetal bovine serum. Medium was replaced every 2 days. Spheroids were allowed to grow for 5 to 7 days before fixation with  $3\%$  paraformaldehyde for 20 minutes at room temperature followed by two washes with phosphate-buffered saline (PBS). Adding and aspirating solutions were done as slowly and gently as possible to avoid damaging the matrix. Cysts were then blocked and permeabilized for 30 minutes at room temperature in a blocking solution containing  $2\%$  BSA,  $1\%$  Triton X-100, and  $25 \text{ mM}$  Tris in PBS prior to staining with antibodies and mounting with Prolong Gold.

### **Light microscopy**

Immunofluorescence imaging of fixed cells was performed using a Nikon Eclipse Ti-E microscope with a CFI Apochromat Nano-Crystal  $60\times$  oil objective (N.A., 1.2) or a Leica TCS SP8 with an HC PL APO  $40\times$  (N.A., 1.30) or  $63\times$  (N.A., 1.40) oil objectives. Bright field imaging for 2D-morphogenesis assays on  $1 \text{ kPa}$  hydrogels was performed with a Super Plan Fluor  $10\times$  objective (N.A. 0.30). FRET imaging of the E-cadherin tension sensor was performed at  $37^\circ\text{C}$  20 to 24 hours after transfection of the sensor plasmids using a Nikon Eclipse Ti-E inverted microscope equipped with excitation and emission CFP and YFP filters in external filter wheels with a CFI Apochromat Nano-Crystal  $60\times$  oil lens (N.A., 1.2) as described (Haas et al., 2020). Crossover between CFP and YFP filters was calibrated by imaging individual fluorescent proteins expressed alone using all four emission/excitation filter combinations. FRET efficiency maps were then generated with the Nikon software with the built-in formula correcting for crossover between CFP and YFP channels. The Nikon Eclipse Ti-E microscope was also used to perform static TFM imaging (Haas et al., 2020). Acquisitions of bright field images of cell islands and images of fluorescent beads were done using a  $20\times$  objective. Focus was maintained using the Nikon Perfect Focus system.  $1 \times 10^3$  to  $3 \times 10^3$  cells transfected with siRNAs were seeded on hydrogels two days before imaging. This range of seeding concentrations were optimized to obtain well separated islands of 10-20 cells on the day of imaging; hence allowing to obtain a sufficient margin of empty surrounding matrix to have sufficiently large no-displacement fields in the images. Cell islands were imaged first in bright field before image stacks of the beads embedded in the contracted substrate were taken in the FITC channel. A solution of  $1 \text{ M}$  NaOH +  $1\%$  sodium dodecyl sulfate was used to lyse cells before acquiring stacks of beads in the relaxed state.

### **Freeze fracture analysis and electron microscopy**



Freeze fracture electron microscopy was done as previously described (Zeissig et al., 2007). In brief, the MDCK clones were fixed with phosphate-buffered glutaraldehyde (2%) and then subsequently incubated in 10% (v/v) and then in 30% (v/v) glycerol. After freezing them in liquid nitrogen-cooled Freon 22, cells were fractured at -100 °C and then shadowed with platinum and carbon in a vacuum evaporator (Denton DV-502). Resulting replicas were treated with sodium hypochlorite, picked up on grids (Ted Pella Inc.), and analyzed with a video-equipped Zeiss 902 electron microscope (Carl Zeiss AG, Jena, Germany; Olympus iTEM Veleta).

### **Image processing and quantifications**

Microscopy and immunoblot images were processed and adjusted using ImageJ/Fiji and Adobe Photoshop CC software. Panels were created using Adobe Photoshop CC software. For quantification of FRET images, ImageJ/Fiji was used to calculate mean integrated densities of junctional segments above measured backgrounds (Haas et al., 2020). For the quantification of confocal xz-sections and tricellular junction accumulation, mean integrated densities of ROIs manually drawn around detectable junctions were calculated and normalized by the one representing the total cell area.

TFM experiments in the present study were done in parallel of the ones described in (Haas et al., 2020) and hence, share the same methods. Experimental drift before and after cell lysis was corrected using the ImageJ Template Matching plugin from Dr. Qingzong Tseng (<https://sites.google.com/site/qingzongtseng/template-matching-ij-plugin>). A Matlab script developed by Martial Balland (Alkasalias et al., 2017; Milloud et al., 2017) was used to perform all computations including particle image velocimetry (PIV), beads tracking, displacement field calculations (linear interpolation on a regular grid with 2.6  $\mu\text{m}$  spacing), unconstrained Fourier Transform Traction Cytometry, traction map generation and strain energy calculations. Islands with an out of equilibrium force over 10% of the sum of the individual force amplitudes were discarded. A final filtering based on island areas was done to obtain comparable pools of island between conditions. Finally, we obtained the strain energy densities by dividing the total strain energy  $U$  (Butler et al., 2002) calculated from the traction and displacement fields by the  $xy$  area covered by cell islands. We then averaged absolute values of single islands across individual gels and expressed these averages as folds of the control condition.

Nuclei counting for discriminating dense and sparse areas was performed with images of Hoechst-stained nuclei that were automatically counted in  $xy$  images using a pipeline of custom ImageJ/Fiji macros which used a Cellpose pretrained model for nuclei segmentation (Stringer et al., 2021). Acquisition with the Nikon Eclipse Ti-E microscope using the 60x objective generated fields of view with an area of  $1.6 \times 10^4 \mu\text{m}^2$ . Fields of view of cells seeded on glass were considered as sparse when nuclei count was between 10 and 25, and dense when nuclei count was over 40. On 40 kPa hydrogels fields were considered sparse when nuclei count was between 15 and 30 and considered dense when it was over 50. No discrimination was done for cells grown on 1 kPa hydrogels as they did form densely packed islands in all experimental conditions.

Discrimination of basal from apical ppMLC staining features in  $z$ -stacks acquired on the Nikon Eclipse Ti-E microscope using the 60x oil objective was performed by selecting substacks of slices most in focus at basal and lateral sides of the cells, before projection using the “extended depth of focus” plugin from the CLIJ2 library (Haase et al., 2020). Grayscale images were then processed using the Image Differentials plugin (Thevenaz et al., 2000) from the ImageJ/Fiji BIG-EPFL update site, which applies a differentiation operation on images

seen as continuous functions. The Smallest Hessian operation was chosen to enhance in-focus features while attenuating out-of-focus ones.

Basal F-actin enhancement was performed on z-stacks of phalloidin-labelled cells obtained with the Nikon Eclipse Ti-E microscope with the 60x oil objective and F-actin signal enhancement was computed in ImageJ/Fiji. Briefly, the most basal in-focus slice in each z-stack was manually selected and projected using the “extended depth of focus” plugin from the CLIJ2 library (Haase et al., 2020). Projections were then convolved using a homemade kernel. Then, after subtracting the background, a Gaussian blur and a Median filter were applied. Finally, the brightness and contrast were adjusted.

F-actin distribution in xz vertical cross-sections was quantified from xz-section images obtained with the Leica TCS SP8 microscope with the 40x oil objective. Apical and basal F-actin staining were manually outlined in single cells and the ratio of the mean fluorescence intensity was calculated for each cell.

Quantification of the junctional formation index for occludin and p120-catenin was performed using multichannel z-stack images acquired on the Nikon Eclipse Ti-E microscope using the 60x oil objective. The analysis of junction formation was done using a semi-automatic pipeline of macros in ImageJ/Fiji. Briefly, most in focus slices for each channel were selected using the “Find focused slices” plugin developed by Qingzong Tseng (<https://sites.google.com/site/qingzongtseng/find-focus>) and stacks were projected in each channel using the “extended depth of focus” plugin from the CLIJ2 library (Haase et al., 2020). Channels were merged back into a composite image and junctions were manually traced using the Line Tool along the visible signal or based on other junctional markers when the analyzed junctional marker was not forming a junction. Tracing was done along the mediatrix between the centers of two nuclei when no clear junction could be seen. Two other lines were traced on both sides along the junctions within the cytosol. The mean fluorescence intensity of the junctional line was divided by the average of the mean fluorescence intensities of the two cytosolic lines to obtain the junctional formation index. The line width used for the analysis of occludin staining was 15px, and 20px for p120-catenin staining.

General features of the distribution of ppMLC in immunostained cells grown on glass, 40 kPa and 1 kPa hydrogels were analyzed in z-stacks obtained with the Nikon Eclipse Ti-E microscope using the 60x oil objective. Most in-focus slices were manually selected to discriminate lateral from basal features. Active myosin bundling at cell periphery and sharp lateral active myosin lines at cell junctions were manually counted. The percentage of cells displaying each feature was calculated per image after having obtained the nuclei count as described above.

The morphogenesis index quantification of cell islands grown on 1kPa hydrogels was performed using bright-field xy images acquired as described above and automatically analyzed using a custom macro in ImageJ/Fiji. Briefly, island outlines were obtained by applying the built-in “Find edges” plugin before applying image cleaning processes (“Despeckle”, “Dilate”, “Fill holes”). Cleaning was further completed with an opening operation from the morphological filters of David Legland’s MorpholibJ plugin (Legland et al., 2016). The built-in “Analyze particles” plugin was applied on the final binary images to obtain the number of cell island per image, reflecting the monolayer fragmentation, and the area of each island, to estimate the coverage of the monolayer per image. The cumulated area of islands per image was expressed as the percentage of coverage, and the ratio of the former to the number of islands was defined as the morphogenesis index.

3D epithelial cysts were generated and imaged as described above. Multichannel z-stacks were carefully visualized along the z-axis to discriminate different distinct lumens in the



spheroids when multiple lumens were visible. The number of lumens per cyst was manually counted and the counts of cysts having defined amounts of lumens per cysts were plotted to compare the distribution of the cyst populations between conditions.

Morphological features of the focal adhesions were analyzed by automatically processing immunofluorescent staining of vinculin with a custom macro in ImageJ/Fiji. Briefly, the images were pre-processed using the built-in “Subtract Background...” plugin before binarization with the “Adaptative Threshold” plugin developed by Qingzong Tseng (<https://sites.google.com/site/qingzongtseng/adaptivethreshold>). The “Watershed Irregular Features” plugin from Jan Brocher’s BioVoxxel Toolbox (“BioVoxxel” update site) was then applied. Single focal adhesions areas and maximum Feret diameters were then obtained using the built-in “Analyze particles” plugin. Data were expressed as the average of the measurements per image.

Cell morphometric analysis from multichannel z-stack images of cells stained for junctional markers with the Nikon Eclipse Ti-E microscope using the 60x oil objective was performed following the same method as described in (Haas et al., 2020). It consists of a pipeline of custom ImageJ/Fiji macros. Briefly, a binary mask of cell-cell junctions was produced by using the Ridge Detection plugin (Steger, 1998) on maximum projections of the occludin staining. Small cytosolic objects were cleared using the Analyze Particle tool. The mask obtained was then overlaid on a multichannel RGB images with slices picked manually for the best focus for each channel, and cell edges were corrected based on AJ (p120-catenin or  $\alpha$ -catenin staining) and manually traced if no TJ was detectable. Cell segmentation was then produced using the Tissue Analyzer plugin (Aigouy et al., 2016), which produced ROIs corresponding to single cells and random color maps of the segmentations. Morphometric data were computed directly from the ROIs after exporting them back into Fiji/ImageJ.

The morphometrical analysis of TJ ultrastructures was performed using images taken with a video-equipped Zeiss 902 electron microscope (Carl Zeiss AG, Jena, Germany; Olympus iTEM Veleta) at a magnification of 51,000 $\times$ . Within the images, vertical grid lines were drawn at 200 nm intervals perpendicular to the most apical TJ strand and the horizontally oriented number of strands within the main TJ meshwork was counted at intersections with the grid lines. Meshwork depth was measured as the distance between the most apical and contra-apical strand, and strand discontinuities within the main compact TJ meshwork of >20 nm were defined as “breaks”. Strand appearance was noted as “particle type” or “continuous type”. For the wt cells 53 TJs were analyzed, while for the ZO-1 KO 28 and 25 TJs were analyzed. As for the ZO-1/2 KO only rarely TJ with strands were detected; in addition to these, areas where TJ clearly would be present were analyzed, leading to 29 images that were used.

### **Statistics and Reproducibility**

For the quantifications shown, provided data points refer to the numbers of cells, TJ, tricellular junctions, image fields or cell islands analyzed per type of sample (this information is provided in figure legends) and are derived from at least three independent experiments. All immunoblots represent repeats of 3 or more experiments. Statistical significance was tested using nonparametric Kruskal-Wallis and Wilcoxon tests. The FRET experiments are shown as standard box plots (25th to 75th percentiles, with a line indicating the median, and the analysed numbers of cells are provided in the figure legends). All other quantifications show all data points along with the mean and standard deviation for each category, as well as the median and interquartile ranges. For the statistical analysis of the TJ ultrastructure, Student’s t-test with correction for multiple testing (Bonferroni-Holm) was used and for the proportions of strand appearance, the Z-test also with Bonferroni-Holm adjustment was performed. P-

values below  $p=0.05$  were defined as statistically significant. Graphs and statistical calculations were generated with JMP-Pro or GraphPad Prism.

## DATA AVAILABILITY

The datasets generated during and analysed during the current study are available from the corresponding authors on reasonable request.

## ACKNOWLEDGMENTS

We are very grateful for all antibodies and plasmids provided by colleagues, and further like to thank In-Fah M. Lee from Clinical Physiology / Nutritional Medicine for her excellent technical assistance in performing the freeze fracture part. This work was supported by the BBSRC (BB/N014855/1 and BB/N001133/1) and the German Research Council (DFG; TRR241, project B06).

## AUTHOR CONTRIBUTIONS

AJH and KM performed experiments and analyzed data. SK performed the freeze fracture analysis. TO, MF, RM and AF generated MDCK knockout cell lines. AJH, CZ, MSB and KM designed the project and drafted the manuscript. All authors read and contributed to the final version of the manuscript.

## COMPETING INTERESTS

The authors declare no competing interests.

## REFERENCES

- Aigouy, B., D. Umetsu, and S. Eaton. 2016. Segmentation and Quantitative Analysis of Epithelial Tissues. *Methods Mol Biol.* 1478:227-239.
- Aijaz, S., F. D'Atri, S. Citi, M.S. Balda, and K. Matter. 2005. Binding of GEF-H1 to the tight junction-associated adaptor cingulin results in inhibition of Rho signaling and G1/S phase transition. *Developmental Cell.* 8:777-786.
- Alkasalias, T., A. Alexeyenko, K. Hennig, F. Danielsson, R.J. Lebbink, M. Fielden, S.P. Turunen, K. Lehti, V. Kashuba, H.S. Madapura, B. Bozoky, E. Lundberg, M. Balland, H. Guvén, G. Klein, A.K.B. Gad, and T. Pavlova. 2017. RhoA knockout fibroblasts lose tumor-inhibitory capacity in vitro and promote tumor growth in vivo. *Proc Natl Acad Sci U S A.* 114:E1413-E1421.
- Balda, M.S., M.D. Garrett, and K. Matter. 2003. The ZO-1-associated Y-box factor ZONAB regulates epithelial cell proliferation and cell density. *J Cell Biol.* 160:423-432.
- Balda, M.S., J.A. Whitney, C. Flores, S. Gonzalez, M. Cerejido, and K. Matter. 1996. Functional dissociation of paracellular permeability and transepithelial electrical resistance and disruption of the apical-basolateral intramembrane diffusion barrier by expression of a mutant tight junction membrane protein. *J Cell Biol.* 134:1031-1049.
- Benais-Pont, G., A. Punn, C. Flores-Maldonado, J. Eckert, G. Raposo, T.P. Fleming, M. Cerejido, M.S. Balda, and K. Matter. 2003. Identification of a tight junction-associated guanine nucleotide exchange factor that activates Rho and regulates paracellular permeability. *The Journal of Cell Biology.* 160:729-740.
- Beutel, O., R. Maraschini, K. Pombo-García, C. Martin-Lemaitre, and A. Honigmann. 2019. Phase Separation of Zonula Occludens Proteins Drives Formation of Tight Junctions. *Cell.* 179:923-936.e911.
- Borghi, N., M. Lowndes, V. Maruthamuthu, M.L. Gardel, and W.J. Nelson. 2010. Regulation of cell motile behavior by crosstalk between cadherin- and integrin-mediated adhesions. *Proceedings of the National Academy of Sciences.* 107:13324-13329.

- Borghi, N., M. Sorokina, O.G. Shcherbakova, W.I. Weis, B.L. Pruitt, W.J. Nelson, and A.R. Dunn. 2012. E-cadherin is under constitutive actomyosin-generated tension that is increased at cell–cell contacts upon externally applied stretch. *Proc Natl Acad Sci U S A*. 109:12568-12573.
- Butler, J.P., I.M. Tolić-Nørrelykke, B. Fabry, and J.J. Fredberg. 2002. Traction fields, moments, and strain energy that cells exert on their surroundings. *American Journal of Physiology-Cell Physiology*. 282:C595-C605.
- Calderon, V., A. Lazaro, R.G. Contreras, L. Shoshani, C. Flores-Maldonado, L. Gonzalez-Mariscal, G. Zampighi, and M. Cerejido. 1998. Tight junctions and the experimental modifications of lipid content. *J Membr Biol*. 164:59-69.
- Cartagena-Rivera, A.X., C.M. Van Itallie, J.M. Anderson, and R.S. Chadwick. 2017. Apical surface supracellular mechanical properties in polarized epithelium using noninvasive acoustic force spectroscopy. *Nature Communications*. 8:1030.
- Cerejido, M., I. Meza, and A. Martinez-Palomo. 1981. Occluding junctions in cultured epithelial monolayers. *Am J Physiol*. 240:C96-102.
- Charras, G., and A.S. Yap. 2018. Tensile Forces and Mechanotransduction at Cell–Cell Junctions. *Current Biology*. 28:R445-R457.
- Elosegui-Artola, A., R. Oria, Y. Chen, A. Kosmalska, C. Pérez-González, N. Castro, C. Zhu, X. Trepast, and P. Roca-Cusachs. 2016. Mechanical regulation of a molecular clutch defines force transmission and transduction in response to matrix rigidity. *Nature Cell Biology*. 18:540-548.
- Fanning, A.S., B.J. Jameson, L.A. Jesaitis, and J.M. Anderson. 1998. The Tight Junction Protein ZO-1 Establishes a Link between the Transmembrane Protein Occludin and the Actin Cytoskeleton\*. *Journal of Biological Chemistry*. 273:29745-29753.
- Furuse, M., K. Furuse, H. Sasaki, and S. Tsukita. 2001. Conversion of zonulae occludentes from tight to leaky strand type by introducing claudin-2 into Madin-Darby canine kidney I cells. *J Cell Biol*. 153:263-272.
- Glaunsinger, B.A., R.S. Weiss, S.S. Lee, and R. Javier. 2001. Link of the unique oncogenic properties of adenovirus type 9 E4-ORF1 to a select interaction with the candidate tumor suppressor protein ZO-2. *EMBO J*. 20:5578-5586.
- Gonzalez-Mariscal, L., J. Miranda, A. Raya-Sandino, A. Dominguez-Calderon, and F. Cuellar-Perez. 2017. ZO-2, a tight junction protein involved in gene expression, proliferation, apoptosis, and cell size regulation. *Ann N Y Acad Sci*. 1397:35-53.
- Guilluy, C., V. Swaminathan, R. Garcia-Mata, E.T. O'Brien, R. Superfine, and K. Burridge. 2011. The Rho GEFs LARG and GEF-H1 regulate the mechanical response to force on integrins. *Nat Cell Biol*. 13:722-727.
- Haas, A.J., C. Zihni, A. Ruppel, C. Hartmann, K. Ebnet, M. Tada, M.S. Balda, and K. Matter. 2020. Interplay between Extracellular Matrix Stiffness and JAM-A Regulates Mechanical Load on ZO-1 and Tight Junction Assembly. *Cell Reports*. 32:107924.
- Haase, R., L.A. Royer, P. Steinbach, D. Schmidt, A. Dibrov, U. Schmidt, M. Weigert, N. Maghelli, P. Tomancak, F. Jug, and E.W. Myers. 2020. CLIJ: GPU-accelerated image processing for everyone. *Nature Methods*. 17:5-6.
- Herzlinger, D.A., T.G. Easton, and G.K. Ojakian. 1982. The MDCK epithelial cell line expresses a cell surface antigen of the kidney distal tubule. *J Cell Biol*. 93:269-277.
- Huerta, M., R. Munoz, R. Tapia, E. Soto-Reyes, L. Ramirez, F. Recillas-Targa, L. Gonzalez-Mariscal, and E. Lopez-Bayghen. 2007. Cyclin D1 is transcriptionally down-regulated by ZO-2 via an E box and the transcription factor c-Myc. *Mol Biol Cell*. 18:4826-4836.
- Katsuno, T., K. Umeda, T. Matsui, M. Hata, A. Tamura, M. Itoh, K. Takeuchi, T. Fujimori, Y.-i. Nabeshima, T. Noda, S. Tsukita, and S. Tsukita. 2008. Deficiency of Zonula Occludens-1 Causes Embryonic Lethal Phenotype Associated with Defected Yolk Sac Angiogenesis and Apoptosis of Embryonic Cells. *Molecular Biology of the Cell*. 19:2465-2475.
- Kinoshita, N., T.S. Yamamoto, N. Yasue, C. Takagi, T. Fujimori, and N. Ueno. 2022. Force-dependent remodeling of cytoplasmic ZO-1 condensates contributes to cell-cell adhesion through enhancing tight junctions. *iScience*. 25:103846.

- Kreis, T.E. 1987. Microtubules containing detyrosinated tubulin are less dynamic. *The EMBO journal*. 6:2597-2606.
- Legland, D., I. Arganda-Carreras, and P. Andrey. 2016. MorphoLibJ: integrated library and plugins for mathematical morphology with ImageJ. *Bioinformatics*. 32:3532-3534.
- Ma, Z., and J. Chen. 2020. Premature Termination Codon-Bearing mRNA Mediates Genetic Compensation Response. *Zebrafish*.
- Matter, K., and M.S. Balda. 2003a. Functional analysis of tight junctions. *Methods*. 30:228-234.
- Matter, K., and M.S. Balda. 2003b. Signalling to and from tight junctions. *Nat Rev Mol Cell Biol*. 4:225-236.
- Matter, K., J.A. Whitney, E.M. Yamamoto, and I. Mellman. 1993. Common signals control low density lipoprotein receptor sorting in endosomes and the Golgi complex of MDCK cells. *Cell*. 74:1053-1064.
- McNeil, E., C.T. Capaldo, and I.G. Macara. 2006. Zonula occludens-1 function in the assembly of tight junctions in Madin-Darby canine kidney epithelial cells. *Molecular Biology of the Cell*. 17:1922-1932.
- Milloud, R., O. Destaing, R. de Mets, I. Bourrin-Reynard, C. Oddou, A. Delon, I. Wang, C. Albigès-Rizo, and M. Balland. 2017.  $\alpha\beta3$  integrins negatively regulate cellular forces by phosphorylation of its distal NPXY site. *Biology of the Cell*. 109:127-137.
- Mui, K.L., C.S. Chen, and R.K. Assoian. 2016. The mechanical regulation of integrin-cadherin crosstalk organizes cells, signaling and forces. *Journal of Cell Science*. 129:1093-1100.
- Odenwald, M.A., W. Choi, A. Buckley, N. Shashikanth, N.E. Joseph, Y. Wang, M.H. Warren, M.M. Buschmann, R. Pavlyuk, J. Hildebrand, B. Margolis, A.S. Fanning, and J.R. Turner. 2016. ZO-1 interactions with F-actin and occludin direct epithelial polarization and single lumen specification in 3D culture. *J Cell Sci:jcs*.188185.
- Oka, T., E. Remue, K. Meerschaert, B. Vanloo, C. Boucherie, D. Gfeller, G.D. Bader, S.S. Sidhu, J. Vandekerckhove, J. Gettemans, and M. Sudol. 2010. Functional complexes between YAP2 and ZO-2 are PDZ domain-dependent, and regulate YAP2 nuclear localization and signalling. *Biochem J*. 432:461-472.
- Otani, T., T.P. Nguyen, S. Tokuda, K. Sugihara, T. Sugawara, K. Furuse, T. Miura, K. Ebnet, and M. Furuse. 2019. Claudins and JAM-A coordinately regulate tight junction formation and epithelial polarity. *Journal of Cell Biology*. 218:3372-3396.
- Phua, D.C.Y., J. Xu, S.M. Ali, A. Boey, N.V. Gounko, and W. Hunziker. 2014. ZO-1 and ZO-2 Are Required for Extra-Embryonic Endoderm Integrity, Primitive Ectoderm Survival and Normal Cavitation in Embryoid Bodies Derived from Mouse Embryonic Stem Cells. *PLOS ONE*. 9:e99532.
- Quiros, M., and A. Nusrat. 2014. RhoGTPases, actomyosin signaling and regulation of the epithelial Apical Junctional Complex. *Semin Cell Dev Biol*. 36:194-203.
- Raghunathan, R., J. Zhang, C. Wu, J. Rippy, M. Singh, K.V. Larin, and G. Scarcelli. 2017. Evaluating biomechanical properties of murine embryos using Brillouin microscopy and optical coherence tomography. *J Biomed Opt*. 22:1-6.
- Riveline, D., E. Zamir, N.Q. Balaban, U.S. Schwarz, T. Ishizaki, S. Narumiya, Z. Kam, B. Geiger, and A.D. Bershadsky. 2001. Focal Contacts as Mechanosensors: Externally Applied Local Mechanical Force Induces Growth of Focal Contacts by an Mdia1-Dependent and Rock-Independent Mechanism. *Journal of Cell Biology*. 153:1175-1186.
- Saito, A.C., T. Higashi, Y. Fukazawa, T. Otani, M. Tauchi, A.Y. Higashi, M. Furuse, and H. Chiba. 2021. Occludin and tricellulin facilitate formation of anastomosing tight-junction strand network to improve barrier function. *Molecular Biology of the Cell*. 32:722-738.
- Schwayer, C., S. Shamipour, K. Pranjic-Ferscha, A. Schauer, M. Balda, M. Tada, K. Matter, and C.-P. Heisenberg. 2019. Mechanosensation of Tight Junctions Depends on ZO-1 Phase Separation and Flow. *Cell*. 179:937-952.e918.



- Shigetomi, K., Y. Ono, T. Inai, and J. Ikenouchi. 2018. Adherens junctions influence tight junction formation via changes in membrane lipid composition. *J Cell Biol.* 217:2373-2381.
- Skamrahl, M., H. Pang, M. Ferle, J. Gottwald, A. Rübelling, R. Maraschini, A. Honigmann, T.A. Oswald, and A. Janshoff. 2021. Tight Junction ZO Proteins Maintain Tissue Fluidity, Ensuring Efficient Collective Cell Migration. *Advanced Science.* 8:2100478.
- Soofi, S.S., J.A. Last, S.J. Liliensiek, P.F. Nealey, and C.J. Murphy. 2009. The elastic modulus of Matrigel as determined by atomic force microscopy. *J Struct Biol.* 167:216-219.
- Sourisseau, T., A. Georgiadis, A. Tsapara, R.R. Ali, R. Pestell, K. Matter, and M.S. Balda. 2006. Regulation of PCNA and Cyclin D1 Expression and Epithelial Morphogenesis by the ZO-1-Regulated Transcription Factor ZONAB/DbpA. *Molecular and Cellular Biology.*
- Spadaro, D., S. Le, T. Laroche, I. Mean, L. Jond, J. Yan, and S. Citi. 2017. Tension-Dependent Stretching Activates ZO-1 to Control the Junctional Localization of Its Interactors. *Curr Biol.* 27:3783-3795 e3788.
- Steed, E., M.S. Balda, and K. Matter. 2010. Dynamics and functions of tight junctions. *Trends Cell Biol.* 20:142-149.
- Steger, C. 1998. An unbiased detector of curvilinear structures. *IEEE Transactions on Pattern Analysis and Machine Intelligence.* 20:113-125.
- Stringer, C., T. Wang, M. Michaelos, and M. Pachitariu. 2021. Cellpose: a generalist algorithm for cellular segmentation. *Nature Methods.* 18:100-106.
- Sugawara, T., K. Furuse, T. Otani, T. Wakayama, and M. Furuse. 2021. Angulin-1 seals tricellular contacts independently of tricellulin and claudins. *J Cell Biol.* 220.
- Tang, X., M.Y. Ali, and M.T.A. Saif. 2012. A Novel Technique for Micro-patterning Proteins and Cells on Polyacrylamide Gels. *Soft Matter.* 8:7197-7206.
- Thevenaz, P., T. Blu, and M. Unser. 2000. Interpolation revisited [medical images application]. *IEEE Transactions on Medical Imaging.* 19:739-758.
- Tokuda, S., T. Higashi, and M. Furuse. 2014. ZO-1 Knockout by TALEN-Mediated Gene Targeting in MDCK Cells: Involvement of ZO-1 in the Regulation of Cytoskeleton and Cell Shape. *PLOS ONE.* 9:e104994.
- Tornavaca, O., M. Chia, N. Dufton, L.O. Almagro, D.E. Conway, A.M. Randi, M.A. Schwartz, K. Matter, and M.S. Balda. 2015. ZO-1 controls endothelial adherens junctions, cell-cell tension, angiogenesis, and barrier formation. *J Cell Biol.* 208:821-838.
- Trepat, X., M.R. Wasserman, T.E. Angelini, E. Millet, D.A. Weitz, J.P. Butler, and J.J. Fredberg. 2009. Physical forces during collective cell migration. *Nature Phys.* 5:426-430.
- Tse, J.R., and A.J. Engler. 2010. Preparation of hydrogel substrates with tunable mechanical properties. *Curr Protoc Cell Biol.* Chapter 10:Unit-10.16.
- Tuncay, H., B.F. Brinkmann, T. Steinbacher, A. Schurmann, V. Gerke, S. Iden, and K. Ebnet. 2015. JAM-A regulates cortical dynein localization through Cdc42 to control planar spindle orientation during mitosis. *Nat Commun.* 6:8128.
- Umeda, K., J. Ikenouchi, S. Katahira-Tayama, K. Furuse, H. Sasaki, M. Nakayama, T. Matsui, S. Tsukita, M. Furuse, and S. Tsukita. 2006. ZO-1 and ZO-2 independently determine where claudins are polymerized in tight-junction strand formation. *Cell.* 126:741-754.
- Umeda, K., T. Matsui, M. Nakayama, K. Furuse, H. Sasaki, M. Furuse, and S. Tsukita. 2004. Establishment and Characterization of Cultured Epithelial Cells Lacking Expression of ZO-1\*. *Journal of Biological Chemistry.* 279:44785-44794.
- Van Itallie, C.M., A.S. Fanning, A. Bridges, and J.M. Anderson. 2009. ZO-1 stabilizes the tight junction solute barrier through coupling to the perijunctional cytoskeleton. *Molecular Biology of the Cell.* 20:3930-3940.
- Vitiello, E., P. Moreau, V. Nunes, A. Mettouchi, H. Maiato, J.G. Ferreira, I. Wang, and M. Balland. 2019. Acto-myosin force organization modulates centriole separation and PLK4 recruitment to ensure centriole fidelity. *Nature Communications.* 10:52.
- Zeissig, S., N. Burgel, D. Gunzel, J. Richter, J. Mankertz, U. Wahnschaffe, A.J. Kroesen, M. Zeitz, M. Fromm, and J.D. Schulzke. 2007. Changes in expression and distribution of

claudin 2, 5 and 8 lead to discontinuous tight junctions and barrier dysfunction in active Crohn's disease. *Gut*. 56:61-72.

Zihni, C., C. Mills, K. Matter, and M.S. Balda. 2016. Tight junctions: from simple barriers to multifunctional molecular gates. *Nat Rev Mol Cell Biol*. 17:564-580.



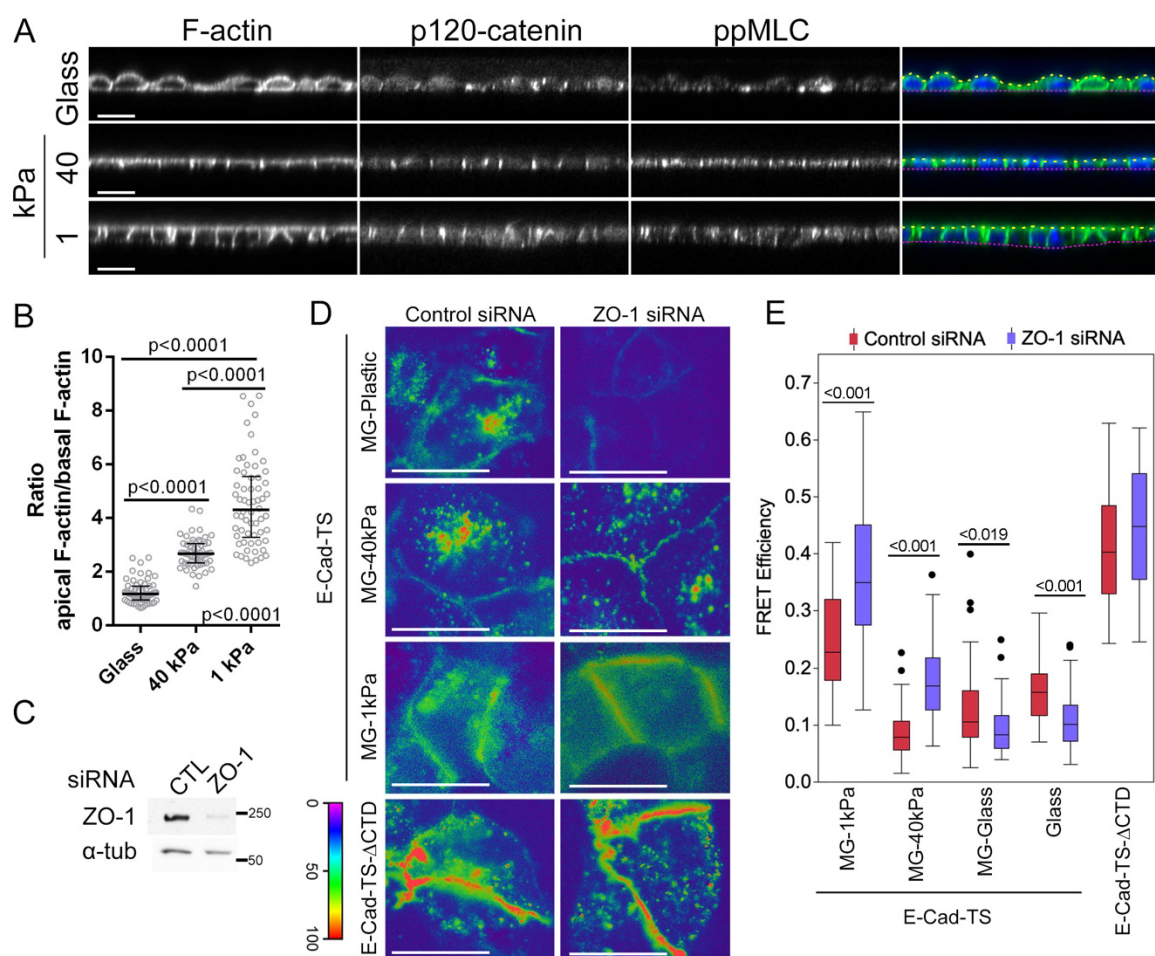

**Figure 1 – ECM stiffness guides ZO-1's function in regulation of AJ tension.**

**A, B** MDCK cells seeded on glass or hydrogels of 40 or 1 kPa stiffness were fixed and stained for F-actin, p120-catenin and ppMLC. Shown are confocal z-sections (A). Single cell ratios of apical over basal F-actin fluorescence intensities were calculated (B; data points represent values from individual cells). **C** Immunoblots confirming ZO-1 depletion by transfection of siRNAs targeting ZO-1 but not by non-targeting (CTL) siRNAs.  $\alpha$ -tubulin is shown as a loading control. **D, E** Cells transfected with siRNAs as in panel C were seeded on substrates of different stiffnesses with or without Matrigel (MG) coating before transfection with an E-cadherin tension sensor constructs with E-cad-TS or without the C-terminal cytoplasmic domain of E-cadherin. FRET analysis was performed by epifluorescence microscopy (D). Panel E shows FRET efficiencies at cell-cell contacts (n is the number of cells analysed for control and ZO-1 siRNAs: E-Cadherin-TS Glass, 54 and 64; MG-Glass, 46 and 45; MG-40kPa, 59 and 59; MG-1kPa 40kPa, 47 and 48; E-Cadherin-TS- $\Delta$ CTD, 28 and 29). Magnification bars, 20  $\mu$ m.

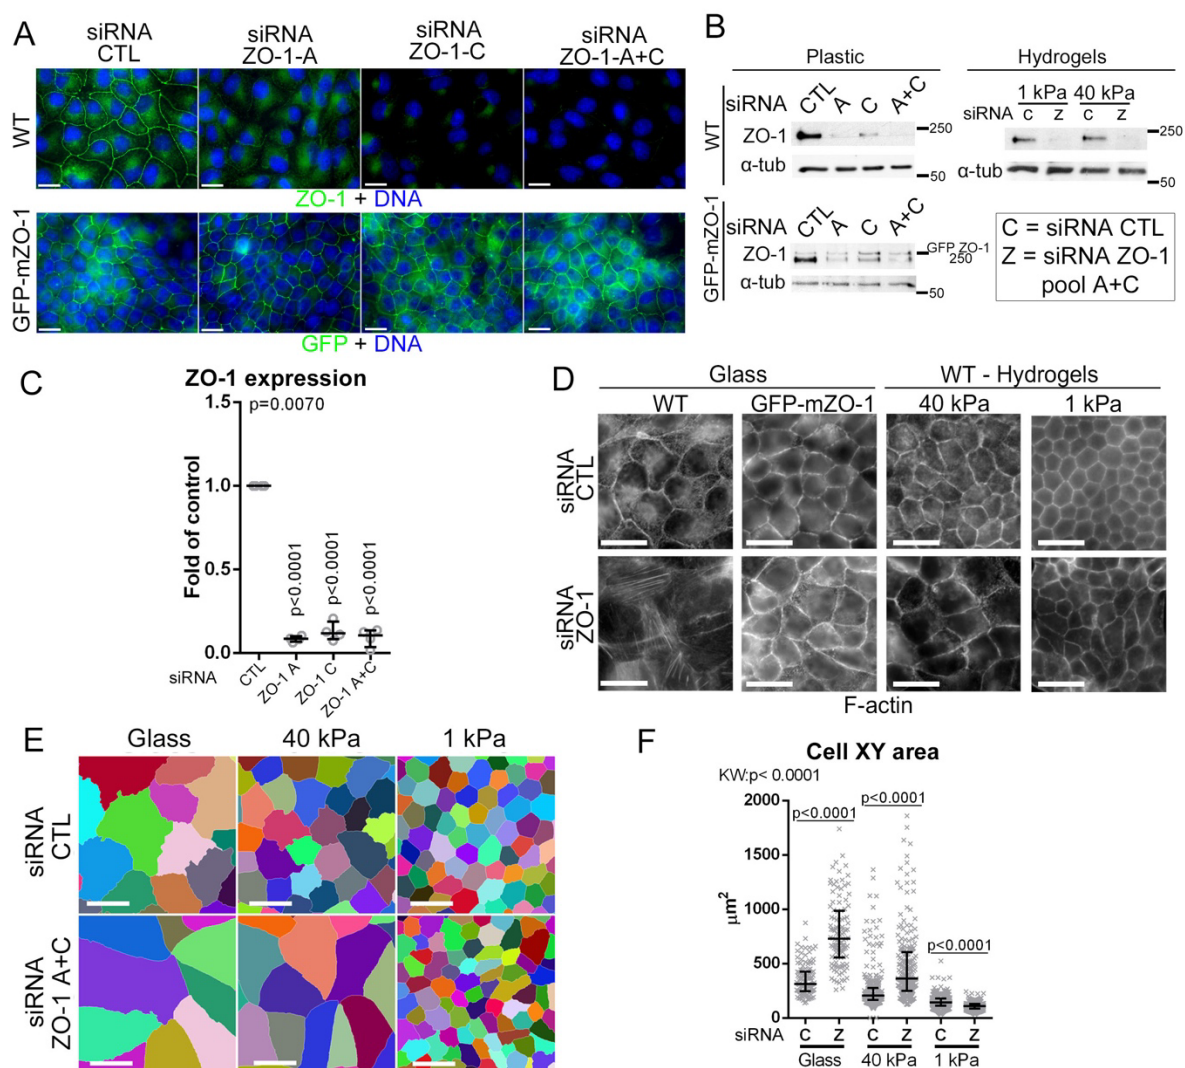

**Figure 2 – ZO-1 regulation of cell morphogenesis is ECM stiffness-dependant.**

**A-C** siRNA-mediated depletion of ZO-1 in control and mouse GFP-tagged ZO-1 (GFP-mZO-1)-expressing MDCK cells using two different siRNAs against ZO-1. Cells were analysed by immunofluorescence (A, upper row, ZO-1; lower row, GFP; nuclei were labelled with Hoechst) or immunoblotting (B,C;  $\alpha$ -tubulin was blotted as a loading control). ZO-1 downregulation was quantified by densitometry (C, data points are derived from independent determinations). **D-F** siRNA transfected wild-type and GFP-ZO-1 cells were seeded on ECM of different elasticities. Cells were stained for F-actin (D) and 2D cell segmentation was performed based on junctional immunostaining (E,F) to quantify single-cell XY areas (data points show individual cells analysed). Magnification bars, 20  $\mu\text{m}$ .

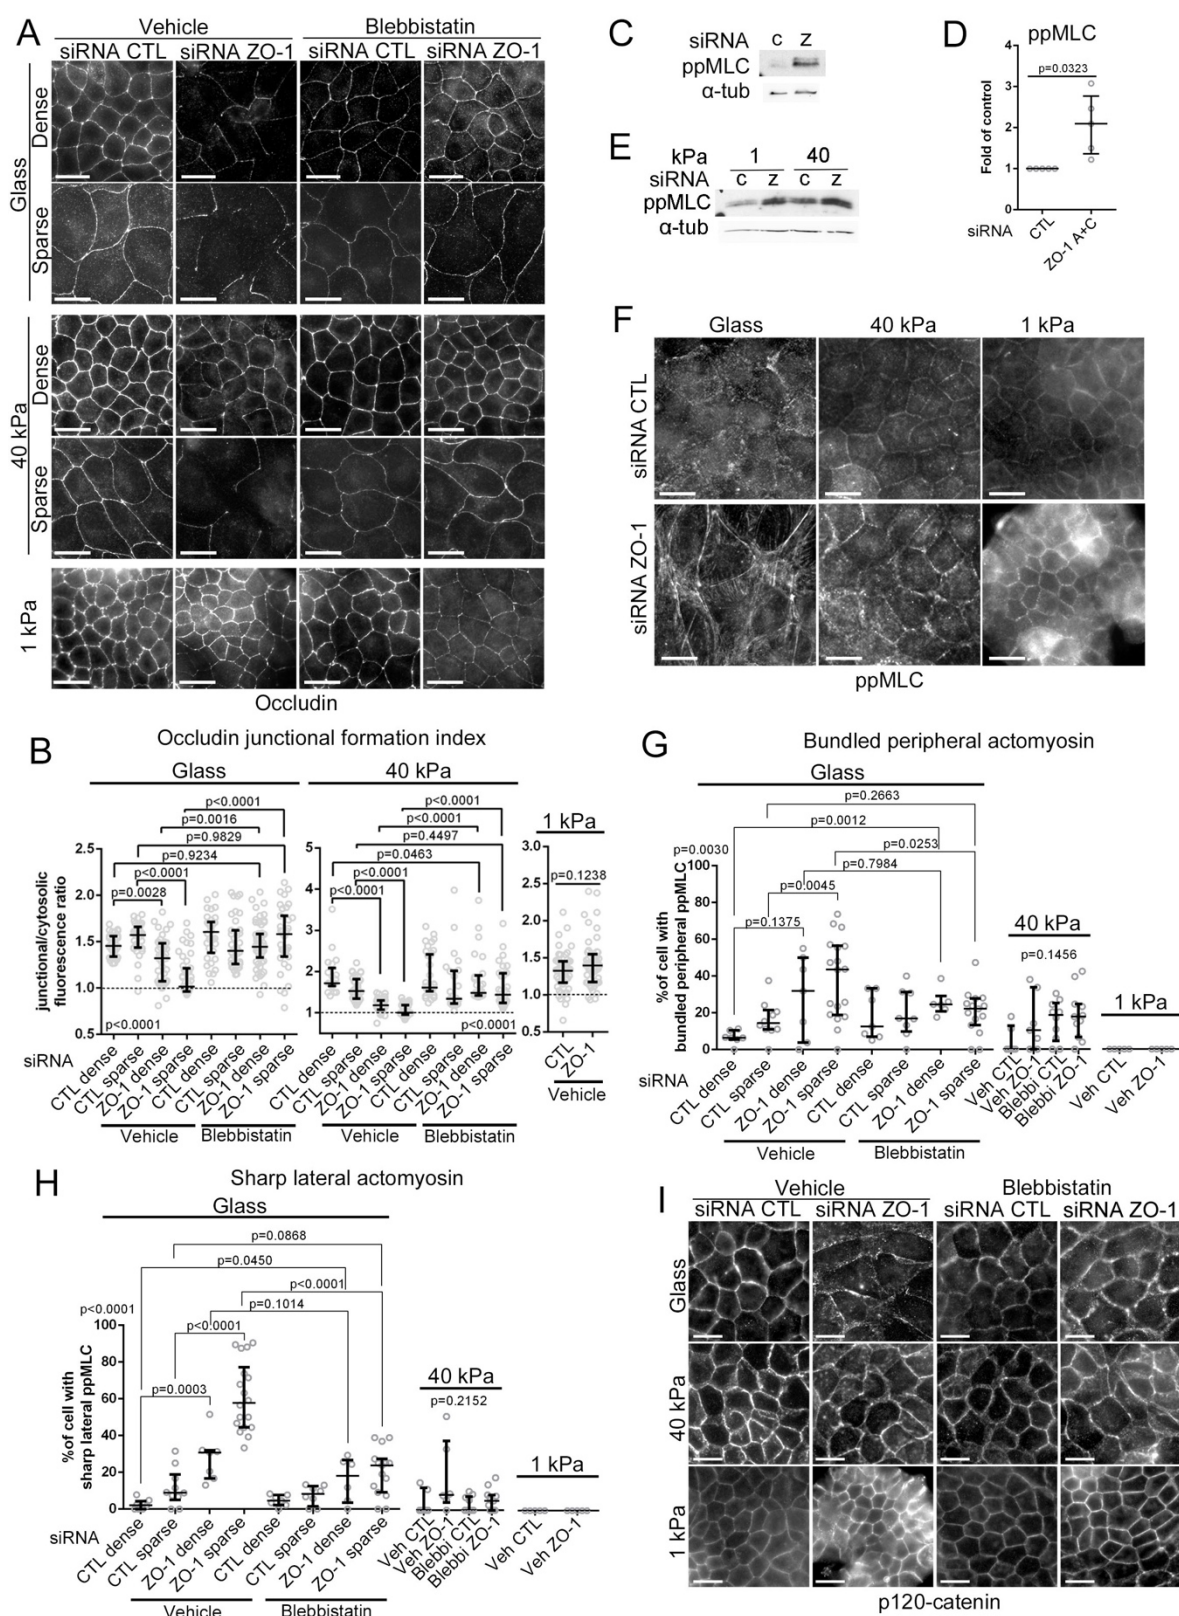

**Figure 3 – ZO-1 is required for junction formation on stiff ECM.**

**A, B** TJ formation by siRNA-transfected MDCK cells plated on ECM of different stiffnesses was analysed by immunofluorescent staining of occludin. Cells were either treated with DMSO (vehicle) or blebbistatin for 24 hours. Quantification of junction formation was performed by measuring single-junction ratios of junctional to cytosolic occludin fluorescence intensity number of cells in each condition (B). **C-E** Actomyosin activity was evaluated by immunoblotting for ppMLC and  $\alpha$ -tubulin as a loading control. Panel D shows quantification of



the ppMLC levels by densitometry of cells plated on glass (data points are independent determinations). **F-H** Immunofluorescence of ppMLC was also performed in cells grown on glass or hydrogels to analyse the distribution of active myosin within cells. The percentage of cells per image displaying thick peripheral ppMLC bundles (G) and sharp lateral ppMLC (H) were manually quantified considering areas with densely and sparsely populated cell areas (n, number of images in each condition). **I** Cells were stained for the AJ marker p120-catenin. Magnification bars, 20  $\mu\text{m}$ .

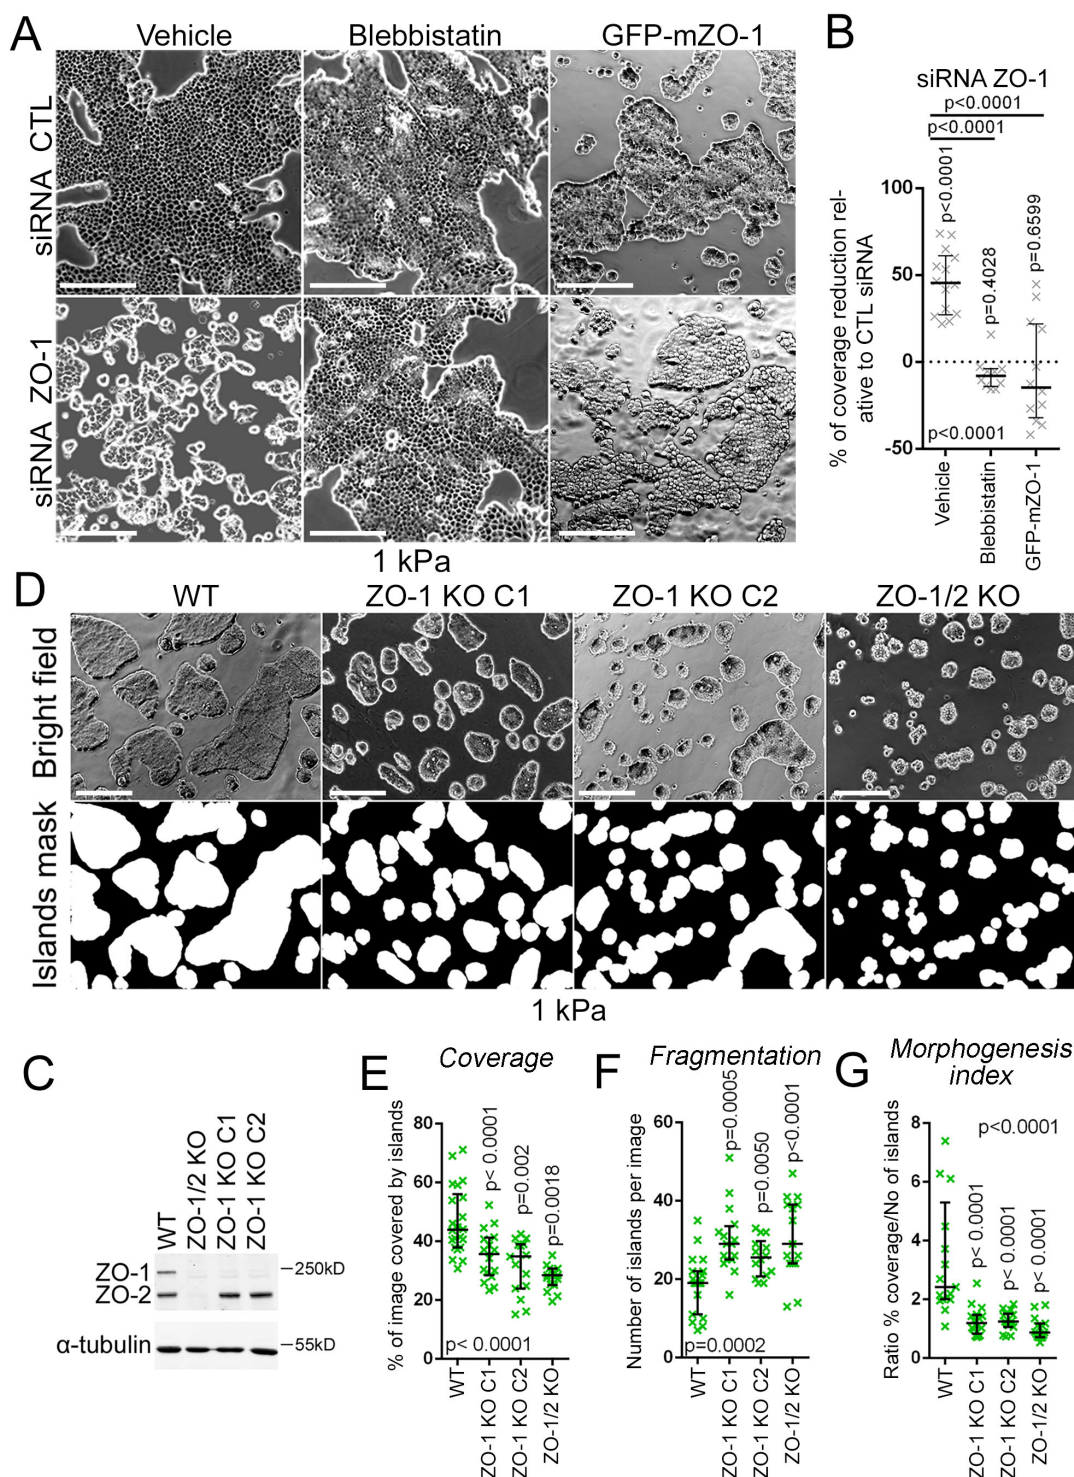

**Figure 4 – ZO-1 is required for epithelial morphogenesis on soft ECM.**

**A, B** siRNA-transfected MDCK cells were seeded on 1kPa hydrogels and treated with DMSO (vehicle) or blebbistatin for 24 hours before bright-field microscopy imaging (A, left and middle panel). GFP-ZO-1 expressing cells were also transfected with siRNA and seeded on 1 kPa hydrogels before imaging (A, right panel). Percentages of area coverage of cell islands was measured (B, data points represent images). **C-G** Wild-type and knockout MDCK cells were analysed by immunoblotting (C) or were seeded on 1 kPa hydrogels before bright-field microscopy imaging and binary segmentation of cell islands (D). Area coverage by cell islands per image (E), the number of islands per image as a measure of fragmentation (F), and the morphogenesis index consisting of the ratio of both parameters (F) were quantified. Data points represent images. Magnification bars, 200  $\mu$ m.

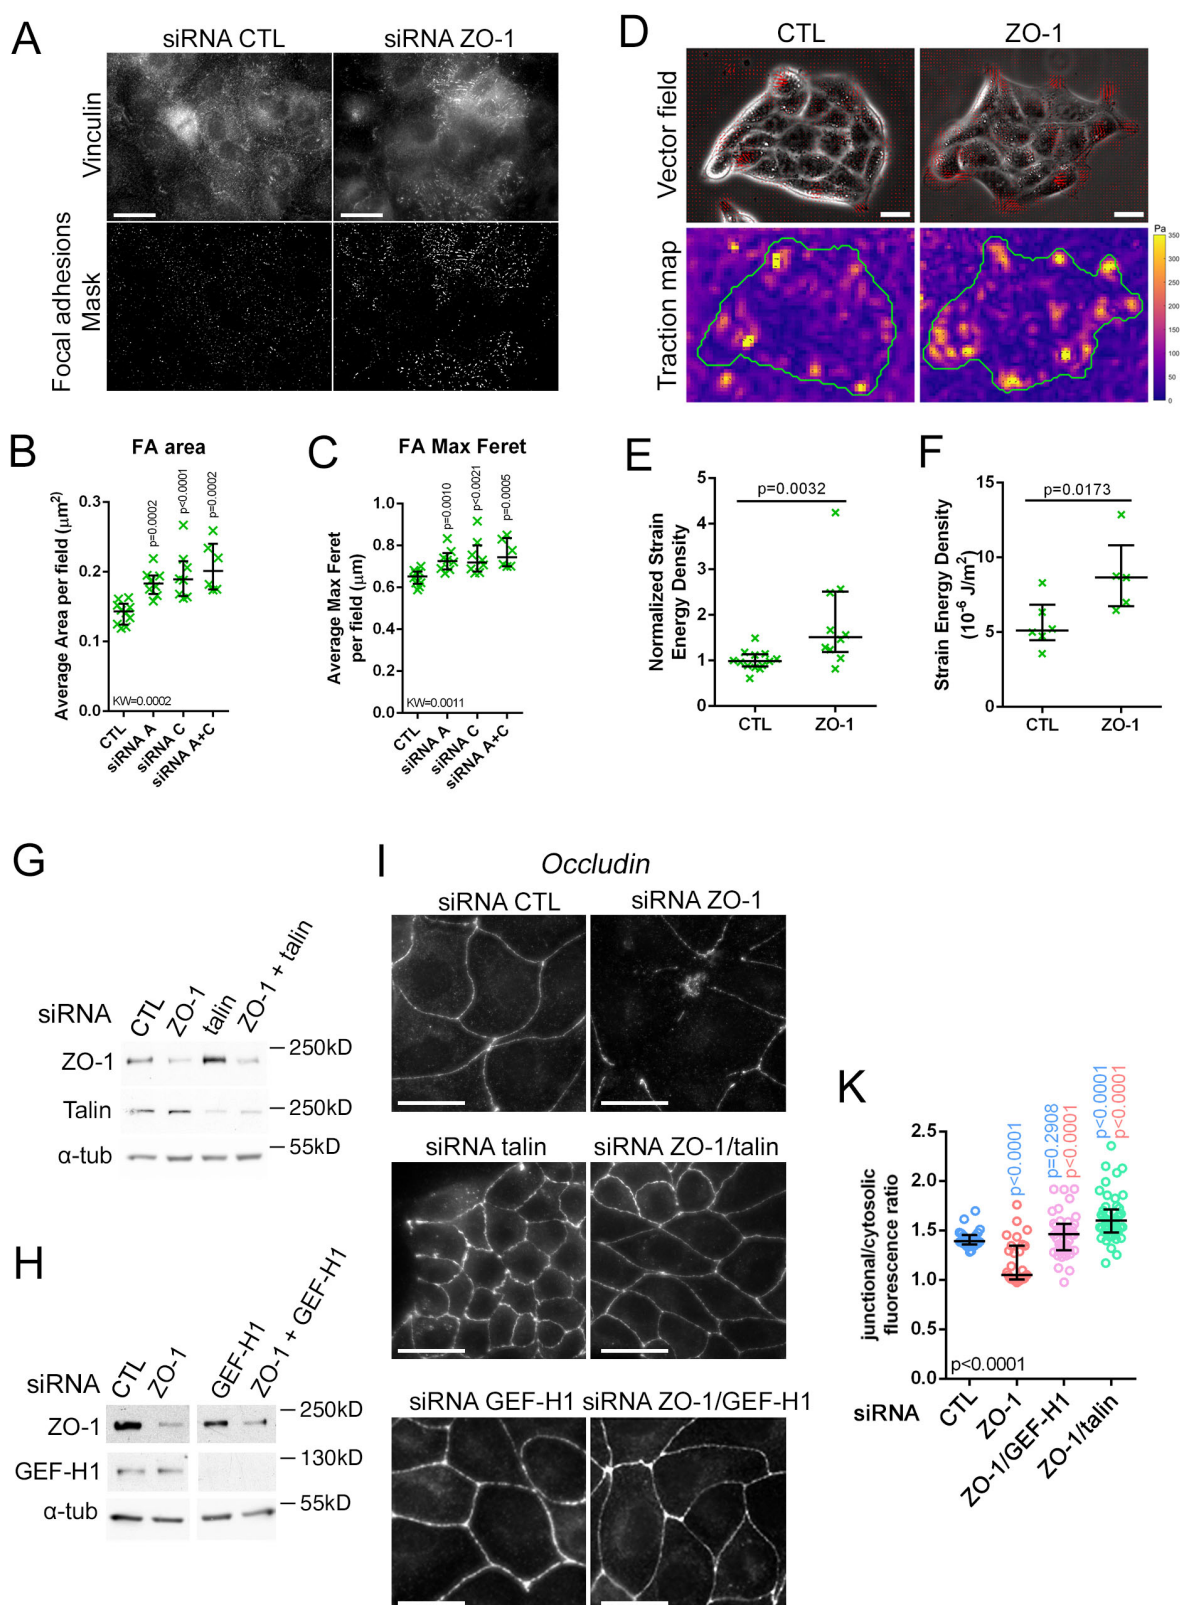

**Figure 5 – ZO-1 regulates basal adhesion architecture and cell traction on the ECM.**

**A-C** siRNA-transfected MDCK cells were immunostained for vinculin to observe focal adhesions by imaging the most basal z-slices of the cells (A, upper images). Binary masks of focal adhesions were computed from the vinculin immunofluorescence images (A, bottom images). From the masks, morphological parameters were analysed: adhesion areas (B) and



the maximal Feret diameters as a measure of elongation ( data points represent cells analysed). **D- F** TFM performed on siRNA-transfected MDCK cell islands. Traction vector fields were overlaid on phase contrast images (D, top) and the corresponding stress maps (D, bottom) were computed. Average strain energy densities of all islands in a single gel were normalized to respective controls (E) number of gels in each condition and absolute values of single islands of one representative experiment were plotted number of islands in each condition (F). The effect of ZO-1 depletion was measured in parallel with that of JAM-A depletion (Haas et al., 2020); hence, the same control siRNA values are shown. **G-K** MDCK cells transfected with siRNAs as indicated (the total concentration of siRNA was kept constant by adding control siRNA) were plated on glass and were then analysed by immunoblotting (G,H) or immunofluorescent staining of occludin (I,K). The junctional relative to cytosolic specific fluorescence intensity was quantified as a measure for junction assembly (K, data points represent analysed cells, blue p values are for comparisons to control and red values for comparisons to ZO-1 siRNA only). Magnification bars, 20  $\mu\text{m}$ .

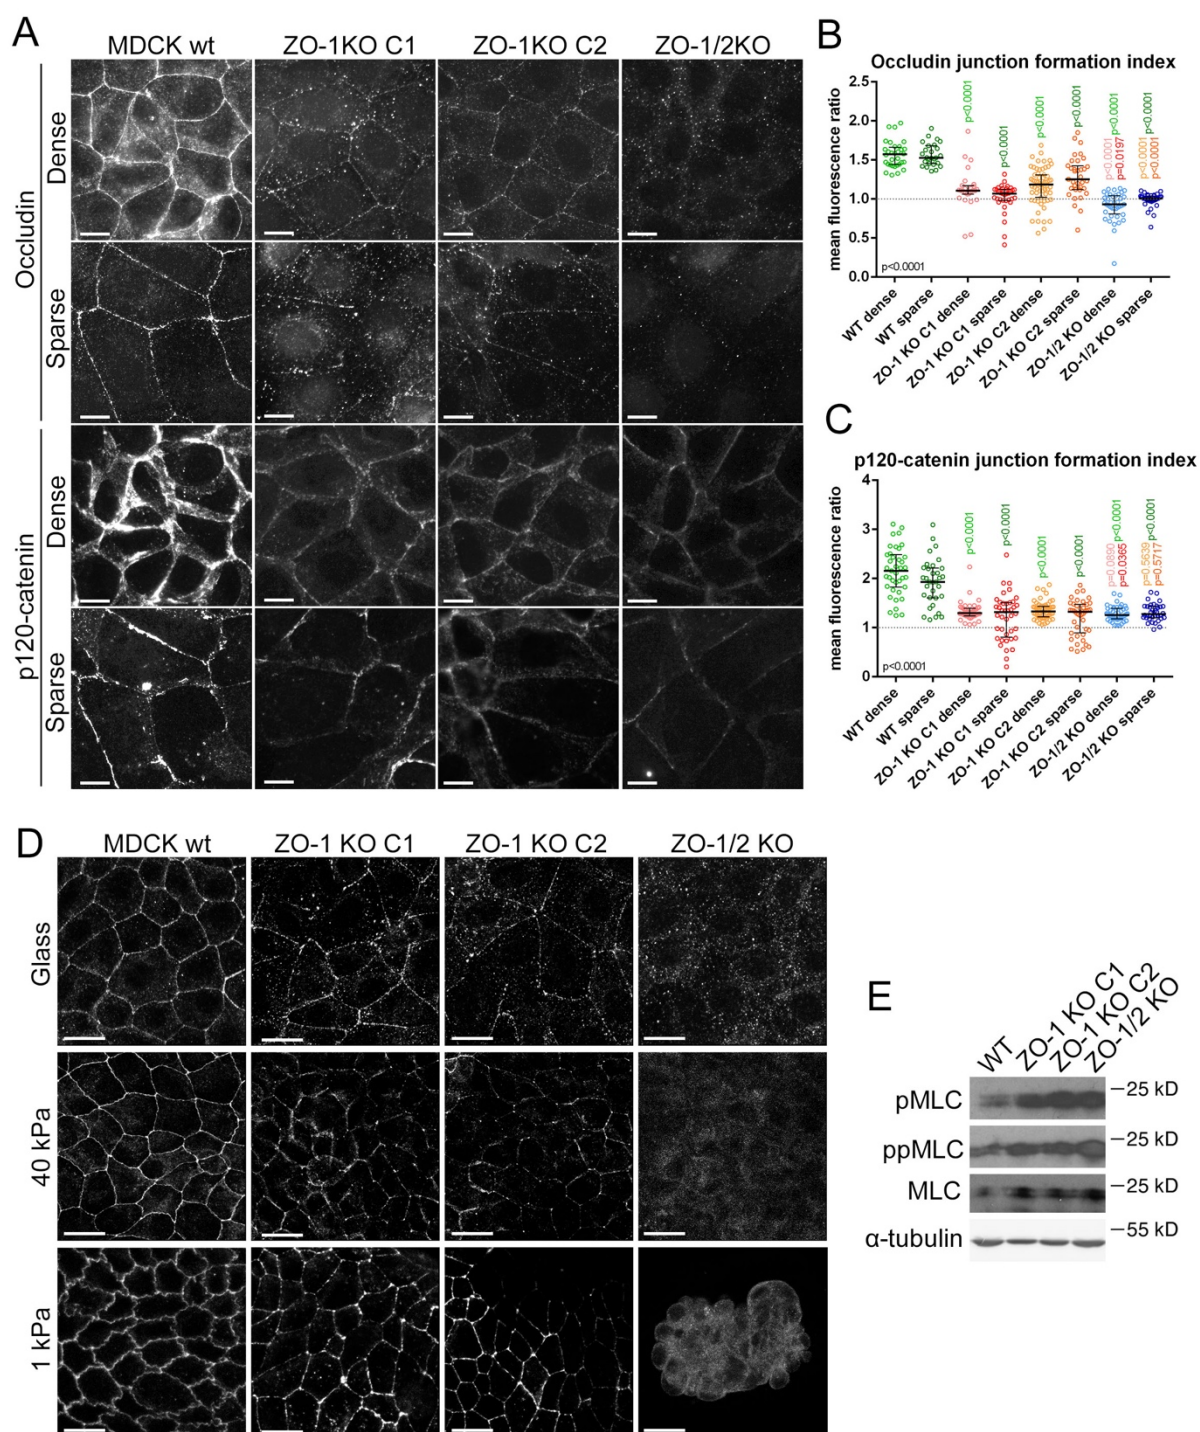

**Figure 6 – Non-redundant role of ZO-1 in TJ formation.**

**A-C** Wild-type and knockout MDCK cells were seeded on glass for 2 days as figure 3 and immunostained for occludin and p120-catenin (A). Quantification of the ratio of junctional to cytosolic mean fluorescence intensity for single junctions was performed for occludin (B) and p120-catenin (C) on images derived from dense and sparse areas (data points represent junctions analysed). **D** Wild-type and knockout MDCK cells were cultured until full confluence before immunostaining for occludin. Note, the reduced junctional occludin staining in ZO-1 knockouts and the discontinuities on all ECM types. On 1kPa ECM, the double knockout cells were unable to form a continuous confluent monolayer. **E** Wild-type and knockout MDCK cells were analysed by immunoblotting for phosphorylated MLC. Magnification bars, 20  $\mu$ m.



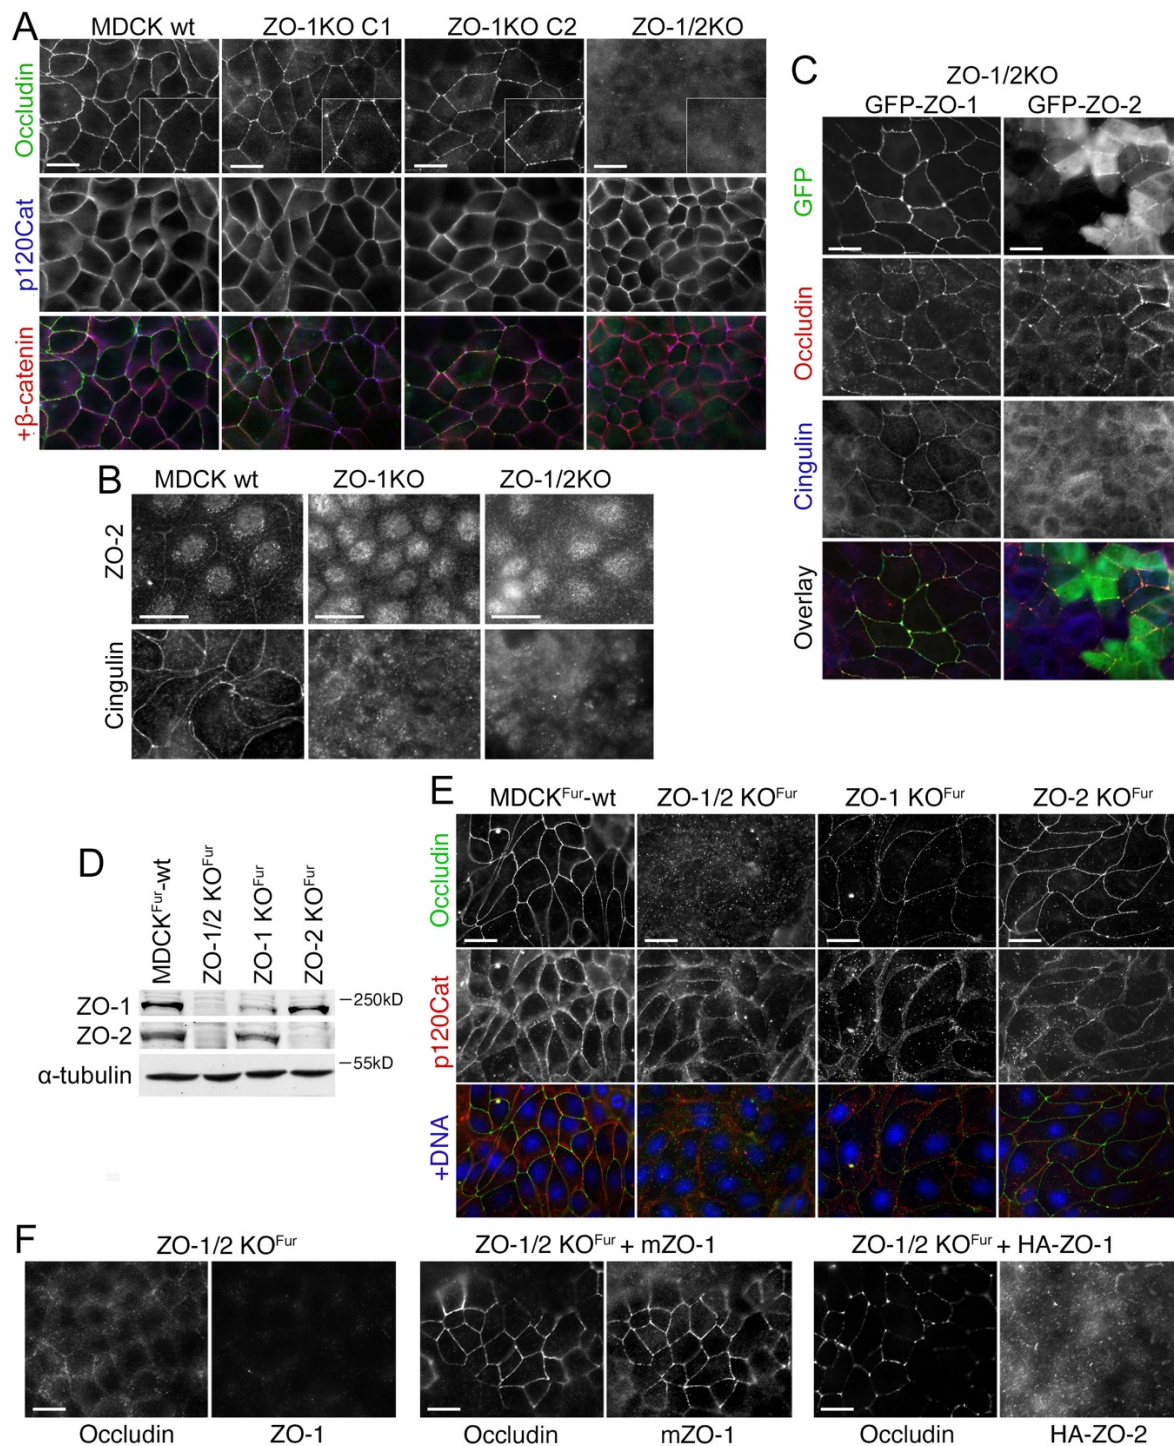

### Figure 7 – ZO-1 and ZO-2 have distinct functions in TJ assembly.

Analysis of wild-type and knockout MDCK cells seeded on glass and grown to confluence by epifluorescence microscopy. **A, B** Cells were stained for the junctional proteins. Note, occludin remained discontinuously distributed and recruitment of cytosolic TJ proteins was strongly attenuated. **C** Double knockout cells were transfected with GFP-ZO-1 or GFP-ZO-2 and TJ formation was analysed by immunostaining occludin and cingulin. Note, only GFP-ZO-1 induced normal distribution of TJ proteins. **D, E** Wild-type and knockout MDCK<sup>Fur</sup> cells were analysed by immunoblotting to monitor expression of ZO-1 and ZO-2 (D, antibodies against epitopes in the C-terminal domain of the ZO proteins was used as in figure 4C) or immunofluorescence to analyse junction formation (E). ZO-1 and ZO-2 were re-expressed in ZO1/2 knockout MDCK<sup>Fur</sup> cells followed by staining for occludin to monitor TJ formation. Magnification bars, 20 μm.

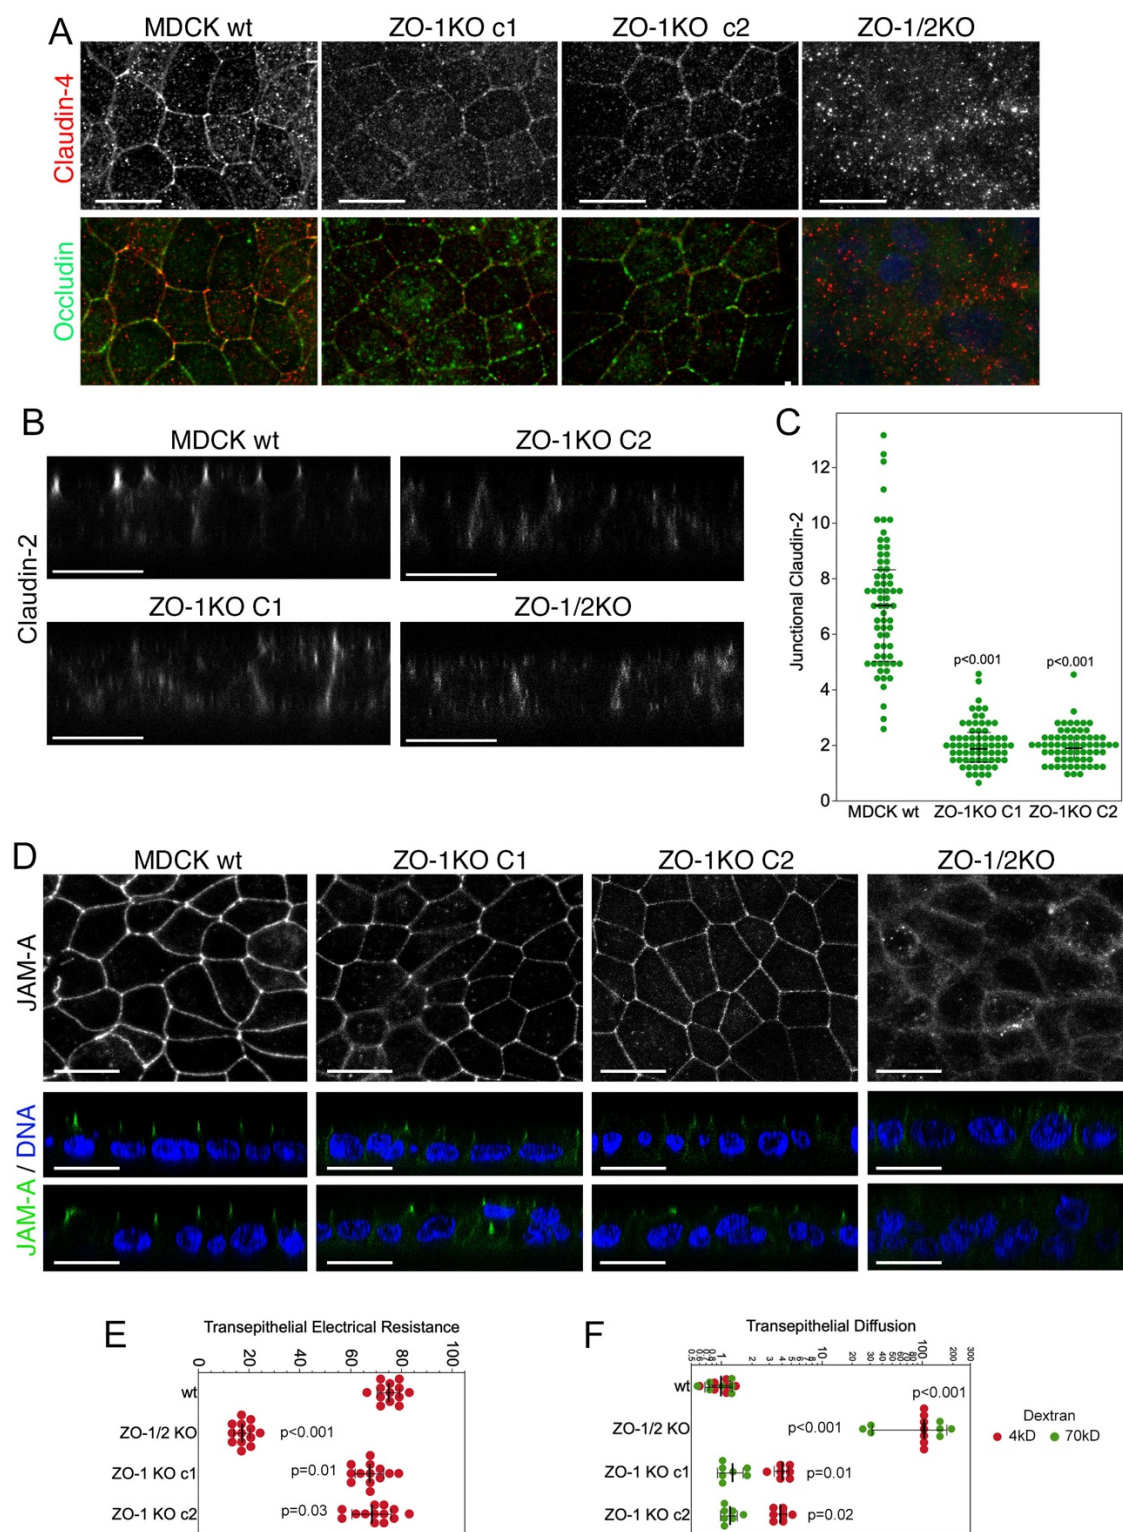

**Figure 8 – ZO-1-deficiency deregulates monolayer permeability.**

Confluent wild-type and knockout MDCK seeded on permeable supports were analysed by immunofluorescence confocal microscopy (**A-D**) or for transmonolayer permeability properties (**E, F**). All confocal XY sections are maximum intensity projections of all sections containing junctional staining. Additional junctional markers and xy-sections along with a quantification of z-sections of samples stained for JAM-A and occludin are shown in supplemental Figure S6. Panel D and E show TER and paracellular flux assays performed with monolayers of the same age as those used analysed by immunofluorescence (data points represent individual filter cultures). Magnification bars, 20  $\mu\text{m}$ .



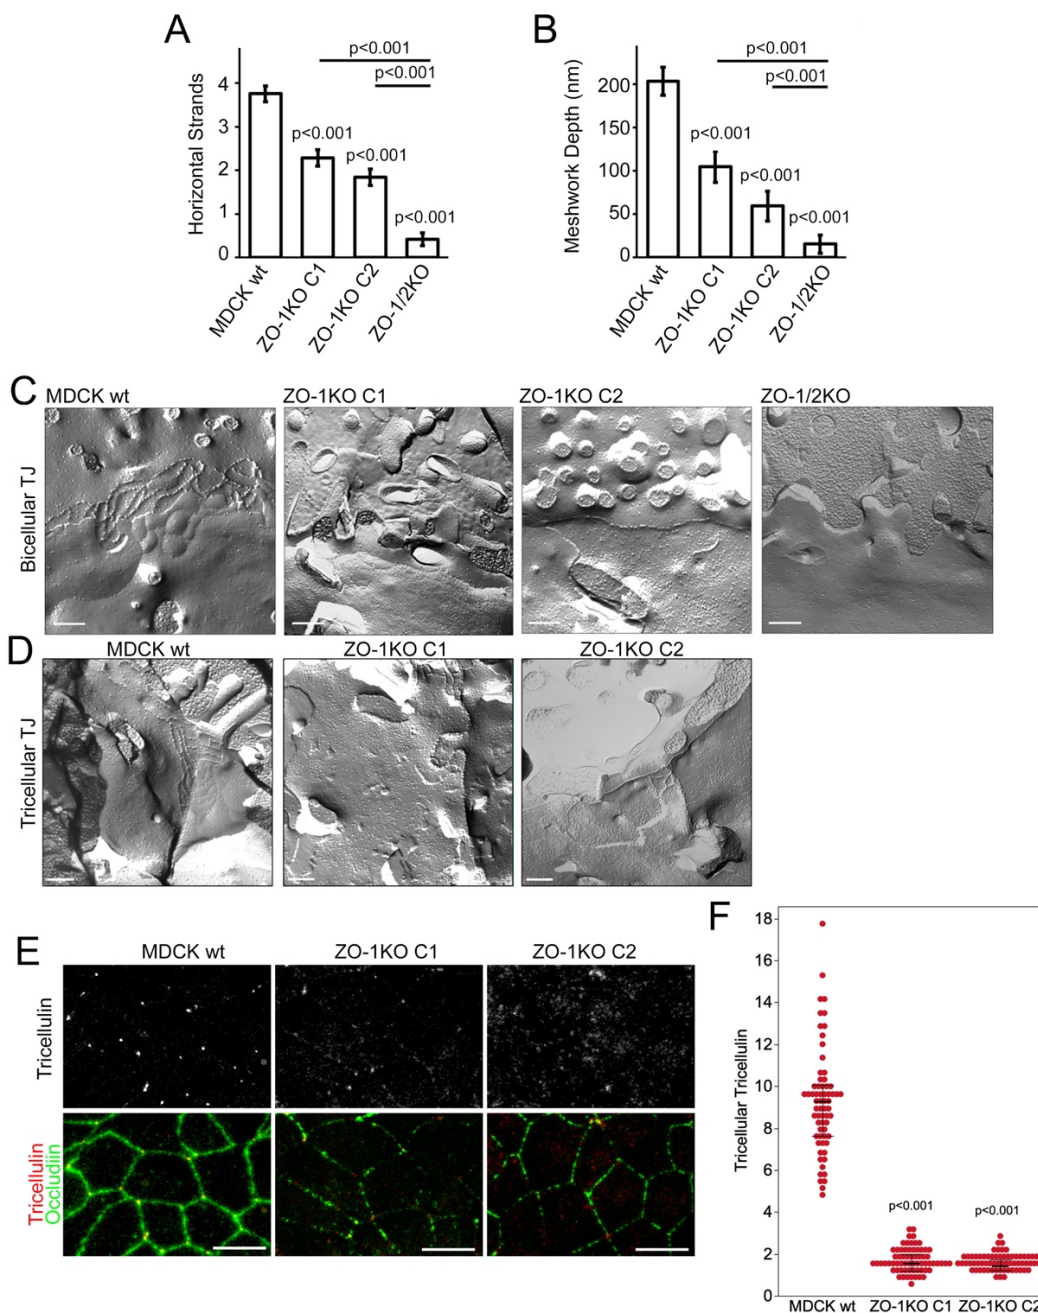

### Figure 9 – ZO-1-deficiency disrupts TJ ultrastructure.

Freeze fracture analysis of TJ ultrastructure of confluent control (wt) and knockout MDCK cells. **A** Numbers of horizontal strands were reduced in ZO-1 KO cells as well as in the ZO-1/2 double KO clone. The double KO cells exhibited even more strongly reduced numbers of strands compared to the ZO-1 KO cells. Note, often no or only one TJ strand could be observed in various replicas of the double KO. **B** The meshwork extension was drastically reduced in ZO-1 KO cells as well as in the ZO-1/2 KO cells. Note, for occurrence of one strand no extension existed. The quantifications are based on the analysis of MDCK wt, 53; ZO-1KO C1, 28; ZO-1KO C2, 25; and ZO-1/2KO, 29 TJ. **C** Representative images of bicellular TJ in MDCK wt and the respective ZO-1 and ZO-1/2 KO cells. **D** Images of tricellular TJ of MDCK wt and the ZO-1 KO cells suggested that in the ZO-1 KO only the central tube was present and the typical horizontal branches as seen in the wild-type controls cells were missing. **E, F** Confocal maximum intensity projections of junctional xy-sections taken from cells stained for tricellulin and occludin. Panel F shows quantifications of accumulation of tricellulin in tricellular corners. Magnification bars, C-D 200 nm; E 20  $\mu$ m



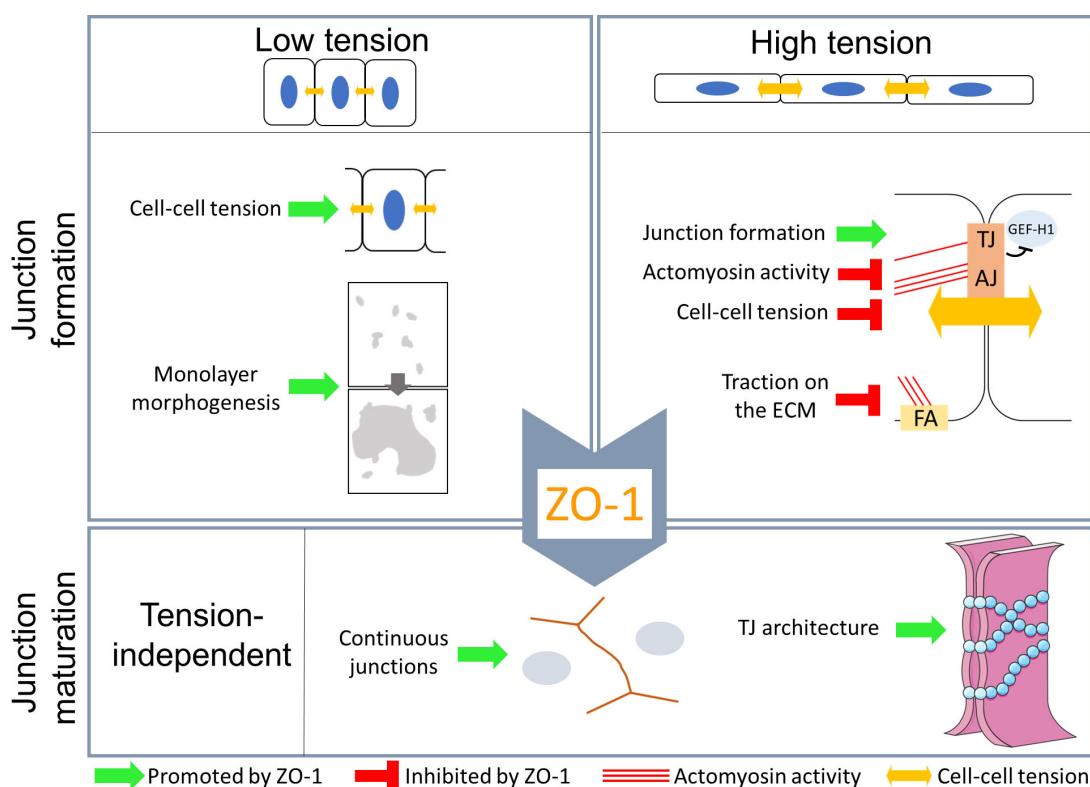

**Figure 10 – Functions of ZO-1 in TJ assembly and epithelial morphogenesis**

Schematic of the functions of ZO-1 during TJ assembly and epithelial morphogenesis on soft and stiff ECM. On soft ECM, ZO-1 is not required for assembly of functional barriers but regulates epithelial morphogenesis and cell-cell tension by tuning contraction and, thereby, epithelial sheet integrity. On stiff ECM, ZO-1 regulates contractility and ECM traction to control TJ assembly. In a second, tension-independent step, ZO-1 is required to assemble morphologically and structurally fully assembled TJ; in its absence, TJ remain partially assembled and functionally altered.
